# Supplementary material for: A conjugated ketone as a catalyst in alcohol amination reactions under transition-metal and hetero-atom free conditions
Source: Royal Society of Chemistry journal article supplement (doi:10.1039/c5ra07681a), 2015-01-01

## A conjugated ketone as a catalyst in alcohol amination reactions under transition-metal and hetero-atom free conditions

Xingchao Dai, Xinjiang Cui, Youquan Deng, and Feng Shi\*

### Supporting Information

#### General

NMR spectra were measured using a Varian NMR system at 400.1 MHz ( $^1\text{H}$ ) and 100.6 MHz ( $^{13}\text{C}$ ). All spectra were recorded in  $\text{CDCl}_3$  and chemical shifts ( $\delta$ ) are reported in ppm relative to tetramethylsilane referenced to the residual solvent peaks.

#### Typical procedure for benzyl alcohol amination with aniline

All of the reactions were performed in a pressure tube. Aniline (1 mmol), 1.5 mmol alcohol, 50 mg of catalyst, 0.5 mmol KOH and 2 mL of toluene were added to a pressure tube followed by exchange with Ar. The tube was sealed and maintained at  $150^\circ\text{C}$  for 4-8 h. After completion of the reaction, the tube was cooled to room temperature, and 10 mL of EtOH were added for quantitative analysis with a GC-FID (Agilent 7890A). The crude mixture was purified by column chromatography.

#### Synthesis of N-benzylaniline<sup>1</sup>

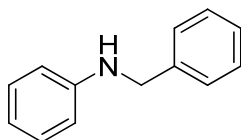

Benzyl alcohol (162 mg, 1.5 mmol), aniline (93 mg, 1 mmol), 50 mg cat-9, 0.5 mmol KOH and 2 ml toluene were added into a 15 mL reaction tube and reacted at  $150^\circ\text{C}$  under Argon atmosphere for 4 h. The crude mixture was purified by column chromatograph (ethyl acetate / petroleum ether = 1/100, v/v; Silica Gel: 200-300 mesh;  $R_f$  = 0.15). Following the procedure above, N-benzylaniline (light yellow solid, m.p.  $35\text{-}36^\circ\text{C}$ ) was obtained (174 mg, Isolated yield = 95%).  $^1\text{H}$  NMR (400 MHz,  $\text{CDCl}_3$ ):  $\delta$  = 7.30 (m, 5H), 7.17 (m, 2H), 6.72 (m, 1H), 6.64 (m, 2H), 4.33 (s, 2H), 4.03 (s, 1H).  $^{13}\text{C}$  NMR (101 MHz,  $\text{CDCl}_3$ ):  $\delta$  = 148.18, 139.47, 129.29, 128.66, 127.54, 127.26, 117.60, 112.88, 48.37.

#### Synthesis of N-benzyl-2-methylaniline<sup>2</sup>

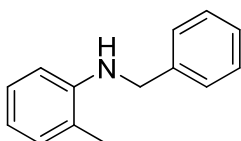

Benzyl alcohol (162 mg, 1.5 mmol), 2-methylaniline (107 mg, 1 mmol), 50 mg cat-9, 0.5 mmol KOH and 2 ml toluene were added into a 15 mL reaction tube and reacted at  $150^\circ\text{C}$  under Argon atmosphere for 8 h. The crude mixture was purified by column

chromatograph (ethyl acetate / petroleum ether = 1/100, v/v; Silica Gel: 200-300 mesh; R<sub>f</sub> = 0.18). Following the procedure above, N-benzyl-2-methylaniline (light yellow solid, m.p. 57-59 °C) was obtained (120 mg, Isolated yield = 61%). <sup>1</sup>H NMR (400 MHz, CDCl<sub>3</sub>): δ = 7.37 (m, 4H), 7.28 (t, 1H), 7.09 (dd, 2H), 6.65 (m, 2H), 4.37 (s, 2H), 3.89 (s, 1H), 2.17 (s, 3H). <sup>13</sup>C NMR (101 MHz, CDCl<sub>3</sub>): δ = 146.05, 139.50, 130.10, 128.69, 127.59, 127.29, 127.19, 117.25, 110.06, 48.37, 17.58.

#### Synthesis of N-benzyl-3-methylaniline<sup>2</sup>

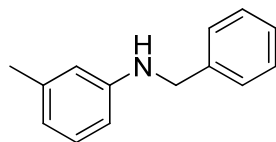

Benzyl alcohol (162 mg, 1.5 mmol), 3-methylaniline (107 mg, 1 mmol), 50 mg cat-9, 0.5 mmol KOH and 2 ml toluene were added into a 15 mL reaction tube and reacted at 150 °C under Argon atmosphere for 4 h. The crude mixture was purified by column chromatograph (ethyl acetate / petroleum ether = 1/100, v/v; Silica Gel: 200-300 mesh; R<sub>f</sub> = 0.15). Following the procedure above, N-benzyl-3-methylaniline (yellow liquid) was obtained (191 mg, Isolated yield = 97%). <sup>1</sup>H NMR (400 MHz, CDCl<sub>3</sub>): δ = 7.31 (m, 5H), 7.06 (m, 1H), 6.50 (m, 3H), 4.32 (s, 2H), 3.95 (s, 1H), 2.27 (s, 3H). <sup>13</sup>C NMR (101 MHz, CDCl<sub>3</sub>): δ = 148.29, 139.63, 139.09, 129.20, 128.66, 127.58, 127.24, 118.58, 113.68, 110.02, 48.41, 21.68.

#### Synthesis of N-benzyl-4-methylaniline<sup>1</sup>

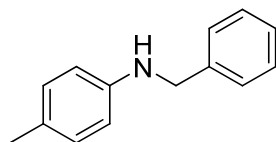

Benzyl alcohol (162 mg, 1.5 mmol), 4-methylaniline (107 mg, 1 mmol), 50 mg cat-9, 0.5 mmol KOH and 2 ml toluene were added into a 15 mL reaction tube and reacted at 150 °C under Argon atmosphere for 4 h. The crude mixture was purified by column chromatograph (ethyl acetate / petroleum ether = 1/100, v/v; Silica Gel: 200-300 mesh; R<sub>f</sub> = 0.15). Following the procedure above, N-benzyl-4-methylaniline (yellow liquid) was obtained (183 mg, Isolated yield = 93%). <sup>1</sup>H NMR (400 MHz, CDCl<sub>3</sub>): δ = 7.29 (m, 5H), 6.98 (d, 2H), 6.56 (d, 2H), 4.30 (s, 2H), 4.01 (s, 1H), 2.23 (s, 3H). <sup>13</sup>C NMR (101 MHz, CDCl<sub>3</sub>): δ = 145.89, 139.66, 129.78, 128.63, 127.55, 127.19, 126.85, 113.09, 48.72, 20.43.

#### Synthesis of N-benzyl-3-ethylaniline<sup>3</sup>

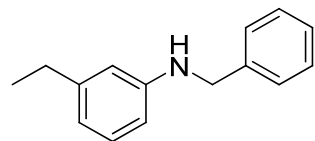

Benzyl alcohol (162 mg, 1.5 mmol), 3-ethylaniline (121 mg, 1 mmol), 50 mg cat-9, 0.5 mmol KOH and 2 ml toluene were added into a 15 mL reaction tube and reacted at 150 °C under Argon atmosphere for 8 h. The crude mixture was purified by column chromatograph (ethyl acetate / petroleum ether = 1/100, v/v; Silica Gel: 200-300 mesh; R<sub>f</sub> = 0.10). Following the procedure above, N-benzyl-4-methylaniline (light yellow liquid) was obtained (177 mg, Isolated yield = 84%). <sup>1</sup>H NMR (400 MHz, CDCl<sub>3</sub>): δ = 7.30 (m, 5H), 7.09 (m, 1H), 6.51 (m, 3H), 4.30 (s, 1H), 3.95 (s, 1H), 2.56 (q, 2H), 1.20 (t, 3H). <sup>13</sup>C NMR (101 MHz, CDCl<sub>3</sub>): δ = 148.35, 145.51, 139.64, 129.27, 128.67, 127.65, 127.26, 117.40, 112.63, 110.22, 48.50, 29.09, 15.59.

#### Synthesis of N-benzyl-4-butaniline<sup>4</sup>

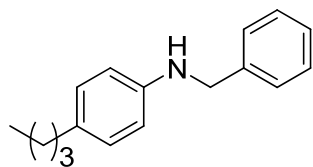

Benzyl alcohol (162 mg, 1.5 mmol), 4-butylaniline (149 mg, 1 mmol),

50 mg cat-9, 0.5 mmol KOH and 2 ml toluene were added into a 15 mL reaction tube and reacted at 150 °C under Argon atmosphere for 8 h. The crude mixture was purified by column chromatograph (ethyl acetate / petroleum ether = 1/100, v/v; Silica Gel: 200-300 mesh; Rf = 0.10). Following the procedure above, N-benzyl-4-methylaniline (yellow liquid) was obtained (203 mg, Isolated yield = 85%). <sup>1</sup>H NMR (400 MHz, CDCl<sub>3</sub>): δ = 7.29 (m, 5H), 6.98 (d, 2H), 6.57 (d, 2H), 4.29 (s, 2H), 3.89 (s, 1H), 2.49 (t, 2H), 1.55 (m, 2H), 1.32 (m, 2H), 0.91 (t, 3H). <sup>13</sup>C NMR (101 MHz, CDCl<sub>3</sub>): δ = 146.16, 139.73, 132.10, 129.17, 128.63, 127.60, 127.20, 112.94, 48.72, 34.77, 34.05, 22.39, 14.04.

#### Synthesis of N-benzyl-4-(tert-butyl)aniline<sup>5</sup>

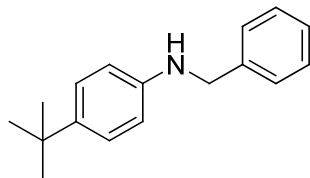

Benzyl alcohol (162 mg, 1.5 mmol), 4-(tert-butyl)aniline (149 mg, 1

mmol), 50 mg cat-9, 0.5 mmol KOH and 2 ml toluene were added into a 15 mL reaction tube and reacted at 150 °C under Argon atmosphere for 8 h. The crude mixture was purified by column chromatograph (ethyl acetate / petroleum ether = 1/100, v/v; Silica Gel: 200-300 mesh; Rf = 0.10). Following the procedure above, N-benzyl-4-methylaniline (yellow liquid) was obtained (221 mg, Isolated yield = 92%). <sup>1</sup>H NMR (400 MHz, CDCl<sub>3</sub>): δ = 7.28 (m, 7H), 6.60 (m, 2H), 4.30 (s, 2H), 3.93 (s, 1H), 1.28 (s, 9H). <sup>13</sup>C NMR (101 MHz, CDCl<sub>3</sub>): δ = 145.92, 140.39, 139.76, 128.64, 127.61, 127.22, 126.07, 112.62, 48.69, 33.91, 31.60.

#### Synthesis of N-benzyl-4-hexylaniline

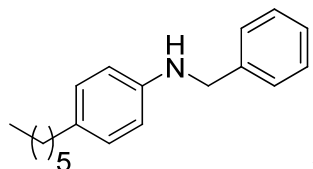

Benzyl alcohol (162 mg, 1.5 mmol), 4-hexylaniline (177 mg, 1 mmol),

50 mg cat-9, 0.5 mmol KOH and 2 ml toluene were added into a 15 mL reaction tube and reacted at 150 °C under Argon atmosphere for 8 h. The crude mixture was purified by column chromatograph (ethyl acetate / petroleum ether = 1/100, v/v; Silica Gel: 200-300 mesh; Rf = 0.10). Following the procedure above, N-benzyl-4-methylaniline (light yellow liquid) was obtained (234 mg, Isolated yield = 88%). <sup>1</sup>H NMR (400 MHz, CDCl<sub>3</sub>): δ = 7.31 (m, 5H), 6.98 (d, 2H), 6.57 (d, 2H), 4.29 (s, 2H), 3.89 (s, 1H), 2.48 (t, 2H), 1.53 (m, 2H), 1.28 (m, 6H), 0.87 (t, 3H). <sup>13</sup>C NMR (101 MHz, CDCl<sub>3</sub>): δ = 146.16, 139.73, 132.15, 129.15, 128.63, 127.60, 127.20, 112.94, 48.72, 35.10, 31.86, 31.84, 29.05, 22.69, 14.17. HR-MS calculated for 268.2065, found 268.2060 (C<sub>19</sub>H<sub>26</sub>N).

### Synthesis of N-benzyl-3,4-dimethylaniline<sup>6</sup>

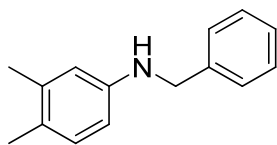

Benzyl alcohol (162 mg, 1.5 mmol), 3, 4-dimethylaniline (121 mg, 1 mmol), 50 mg cat-9, 0.5 mmol KOH and 2 ml toluene were added into a 15 mL reaction tube and reacted at 150 °C under Argon atmosphere for 8 h. The crude mixture was purified by column chromatograph (ethyl acetate / petroleum ether = 1/100, v/v; Silica Gel: 200-300 mesh; R<sub>f</sub> = 0.10). Following the procedure above, N-benzyl-4-methylaniline (yellow liquid) was obtained (206 mg, Isolated yield = 98%). <sup>1</sup>H NMR (400 MHz, CDCl<sub>3</sub>): δ = 7.30 (m, 5H), 6.92 (d, 1H), 6.46 (s, 1H), 6.39 (d, 1H), 4.28 (s, 2H), 3.81 (s, 1H), 2.18 (s, 3H), 2.14 (s, 3H). <sup>13</sup>C NMR (101 MHz, CDCl<sub>3</sub>): δ = 146.46, 139.87, 137.37, 130.36, 128.64, 127.57, 127.18, 125.61, 114.80, 110.32, 48.71, 20.11, 18.76.

### Synthesis of N-benzyl-3,5-dimethylaniline<sup>2</sup>

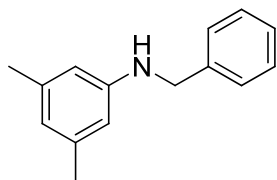

Benzyl alcohol (162 mg, 1.5 mmol), 3, 5-dimethylaniline (121 mg, 1 mmol), 50 mg cat-9, 0.5 mmol KOH and 2 ml toluene were added into a 15 mL reaction tube and reacted at 150 °C under Argon atmosphere for 8 h. The crude mixture was purified by column chromatograph (ethyl acetate / petroleum ether = 1/100, v/v; Silica Gel: 200-300 mesh; R<sub>f</sub> = 0.10). Following the procedure above, N-benzyl-4-methylaniline (light yellow liquid) was obtained (182 mg, Isolated yield = 86%). <sup>1</sup>H NMR (400 MHz, CDCl<sub>3</sub>): δ = 7.30 (m, 5H), 6.39 (s, 1H), 6.28 (s, 2H), 4.29 (s, 2H), 3.97 (s, 1H), 2.22 (s, 6H). <sup>13</sup>C NMR (101 MHz, CDCl<sub>3</sub>): δ = 148.28, 139.65, 138.97, 128.64, 127.62, 127.22, 119.73, 110.88, 48.48, 21.54.

### Synthesis of N-benzyl-3-chloroaniline<sup>2</sup>

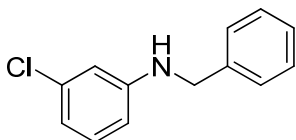

Benzyl alcohol (162 mg, 1.5 mmol), 3-chloroaniline (127 mg, 1 mmol), 50 mg cat-9, 0.5 mmol KOH and 2 ml toluene were added into a 15 mL reaction tube and reacted at 150 °C under Argon atmosphere for 8 h. The crude mixture was purified by column chromatograph (ethyl acetate / petroleum ether = 1/100, v/v; Silica Gel: 200-300 mesh; R<sub>f</sub> = 0.18). Following the procedure above, N-benzyl-3-chloroaniline (light yellow solid, m.p. 93-94 °C) was obtained (212 mg, Isolated yield = 98%). <sup>1</sup>H NMR (400 MHz, CDCl<sub>3</sub>): δ = 7.31 (m, 5H), 7.06 (t, 1H), 6.64 (m, 2H), 6.48 (dd, 1H), 4.29 (s, 2H), 4.12 (s, 1H). <sup>13</sup>C NMR (101 MHz, CDCl<sub>3</sub>): δ = 149.22, 138.76, 135.06, 130.23, 128.76, 127.50, 127.47, 117.47, 112.55, 111.18, 48.15.

### Synthesis of N-benzyl-4-chloroaniline<sup>1</sup>

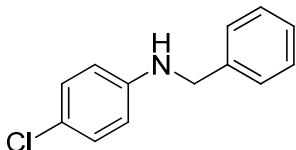

Benzyl alcohol (162 mg, 1.5 mmol), 4-chloroaniline (127 mg, 1 mmol), 50 mg cat-9, 0.5 mmol KOH and 2 ml toluene were added into a 15 mL reaction tube and reacted

at 150 °C under Argon atmosphere for 4 h. The crude mixture was purified by column chromatograph (ethyl acetate / petroleum ether = 1/100, v/v; Silica Gel: 200-300 mesh; R<sub>f</sub> = 0.15). Following the procedure above, N-benzyl-4-chloroaniline (yellow liquid) was obtained (200 mg, Isolated yield = 92%). <sup>1</sup>H NMR (400 MHz, CDCl<sub>3</sub>): δ = 7.30 (m, 5H), 7.10 (d, 2H), 6.54 (m, 2H), 4.29 (s, 2H), 4.15 (s, 1H). <sup>13</sup>C NMR (101 MHz, CDCl<sub>3</sub>): δ = 146.58, 138.90, 129.10, 128.73, 127.47, 127.42, 122.23, 114.03, 48.43.

#### Synthesis of N-benzyl-4-methoxyaniline<sup>5</sup>

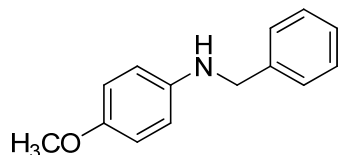

Benzyl alcohol (162 mg, 1.5 mmol), 4-methoxyaniline (123 mg, 1 mmol), 50 mg cat-9, 0.5 mmol KOH and 2 ml toluene were added into a 15 mL reaction tube and reacted at 150 °C under Argon atmosphere for 4 h. The crude mixture was purified by column chromatograph (ethyl acetate / petroleum ether = 1/100, v/v; Silica Gel: 200-300 mesh; R<sub>f</sub> = 0.08). Following the procedure above, N-benzyl-4-methoxyaniline (yellow solid, m.p. 47-49 °C) was obtained (170 mg, Isolated yield = 80%). <sup>1</sup>H NMR (400 MHz, CDCl<sub>3</sub>): δ = 7.32 (m, 5H), 6.77 (d, 2H), 6.60 (d, 2H), 4.28 (s, 2H), 3.79 (s, 1H), 3.73 (s, 3H). <sup>13</sup>C NMR (101 MHz, CDCl<sub>3</sub>): δ = 152.24, 142.47, 139.71, 128.62, 127.57, 127.19, 114.94, 114.14, 55.84, 49.29.

#### Synthesis of N-benzylpyridin-2-amine<sup>1</sup>

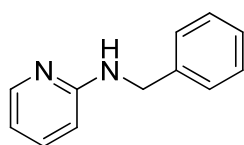

Benzyl alcohol (162 mg, 1.5 mmol), pyridin-2-amine (94 mg, 1 mmol), 50 mg cat-9, 0.5 mmol KOH and 2 ml toluene were added into a 15 mL reaction tube and reacted at 150 °C under Argon atmosphere for 8 h. The crude mixture was purified by column chromatograph (ethyl acetate / petroleum ether = 1/3, v/v; Silica Gel: 200-300 mesh; R<sub>f</sub> = 0.22). Following the procedure above, N-benzylpyridin-2-amine (light yellow solid, m.p. 94-95 °C) was obtained (180 mg, Isolated yield = 98%). <sup>1</sup>H NMR (400 MHz, CDCl<sub>3</sub>): δ = 8.10 (d, 1H), 7.33 (m, 6H), 6.59 (m, 1H), 6.37 (d, 1H), 4.94 (s, 1H), 4.51 (d, 2H). <sup>13</sup>C NMR (101 MHz, CDCl<sub>3</sub>): δ = 158.63, 148.16, 139.18, 137.52, 128.66, 127.42, 127.26, 113.18, 106.85, 46.35.

#### Synthesis of N-benzyl-naphthalen-2-amine<sup>1</sup>

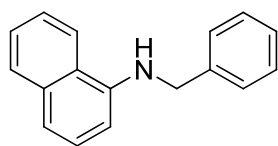

Benzyl alcohol (162 mg, 1.5 mmol), naphthalen-1-amine (143 mg, 1 mmol), 50 mg cat-9 and 1 mmol KOH were added into a 15 mL reaction tube and reacted at 150 °C under Argon atmosphere for 4 h. The crude mixture was purified by column chromatograph (ethyl acetate / petroleum ether = 1/80, v/v; Silica Gel: 200-300 mesh; R<sub>f</sub> = 0.15). Following the procedure above, N-benzyl-naphthalen-1-amine (light yellow solid, m.p. 65-68 °C) was obtained (221 mg, Isolated yield = 95%). <sup>1</sup>H NMR (400 MHz, CDCl<sub>3</sub>): δ = 7.81 (t, 2H), 7.35 (m, 9H), 6.63 (d, 1H), 4.72 (s, 1H), 4.49 (s, 2H). <sup>13</sup>C NMR (101 MHz, CDCl<sub>3</sub>): δ = 139.08, 134.33, 128.76, 128.74, 127.80, 127.45, 126.63, 125.78, 124.81, 123.43, 119.93, 117.74, 104.87, 48.69.

#### Synthesis of N<sup>4</sup>,N<sup>4'</sup>-dibenzyl-[1,1'-biphenyl]-4,4'-diamine<sup>2</sup>

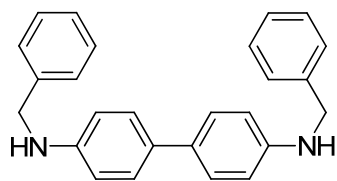

Benzyl alcohol (162 mg, 1.5 mmol), benzidine (92 mg, 0.5 mmol), 50 mg cat-9, 0.5 mmol KOH and 2 ml toluene were added into a 15 mL reaction tube and reacted at 150 °C under Argon atmosphere for 8 h. The crude mixture was purified by filtration and removing the toluene on a Rot-Vap. Following the procedure above,  $N,N'$ -dibenzyl-[1,1'-biphenyl]-4,4'-diamine (light yellow solid, m.p. 178-179 °C) was obtained (159 mg, Isolated yield = 87%).  $^1\text{H}$  NMR (400 MHz,  $\text{CDCl}_3$ ):  $\delta$  = 7.32 (m, 14H), 6.67 (d, 4H), 4.35 (s, 4H), 4.04 (s, 2H).  $^{13}\text{C}$  NMR (101 MHz,  $\text{CDCl}_3$ ):  $\delta$  = 146.74, 139.53, 130.92, 128.67, 127.54, 127.26, 127.21, 113.20, 48.51.

#### Synthesis of $N$ -(2-methylbenzyl)aniline<sup>2</sup>

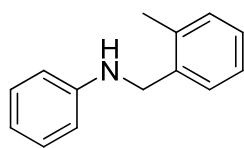

Aniline (93 mg, 1 mmol), 2-methylbenzyl alcohol (183 mg, 1.5 mmol), 50 mg cat-9, 0.5 mmol KOH and 2 ml toluene were added into a 15 mL reaction tube and reacted at 150 °C under Argon atmosphere for 4 h. The crude mixture was purified by column chromatograph (ethyl acetate / petroleum ether = 1/100, v/v; Silica Gel: 200-300 mesh;  $R_f$  = 0.20). Following the procedure above,  $N$ -(2-methylbenzyl)aniline (light yellow solid, m.p. 29-31 °C) was obtained (190 mg, Isolated yield = 96%).  $^1\text{H}$  NMR (400 MHz,  $\text{CDCl}_3$ ):  $\delta$  = 7.35 (dd, 1H), 7.19 (m, 5H), 6.73 (m, 1H), 6.64 (d, 2H), 4.27 (s, 2H), 3.85 (s, 1H), 2.37 (s, 3H).  $^{13}\text{C}$  NMR (101 MHz,  $\text{CDCl}_3$ ):  $\delta$  = 148.31, 137.02, 136.38, 130.44, 129.30, 128.29, 127.45, 126.18, 117.50, 112.73, 46.42, 18.95.

#### Synthesis of $N$ -(3-methylbenzyl)aniline<sup>1</sup>

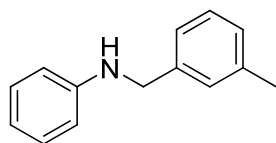

Aniline (93 mg, 1 mmol), 3-methylbenzyl alcohol (183 mg, 1.5 mmol), 50 mg cat-9, 0.5 mmol KOH and 2 ml toluene were added into a 15 mL reaction tube and reacted at 150 °C under Argon atmosphere for 4 h. The crude mixture was purified by column chromatograph (ethyl acetate / petroleum ether = 1/100, v/v; Silica Gel: 200-300 mesh;  $R_f$  = 0.16). Following the procedure above,  $N$ -(3-methylbenzyl)aniline (yellow liquid) was obtained (190 mg, Isolated yield = 96%).  $^1\text{H}$  NMR (400 MHz,  $\text{CDCl}_3$ ):  $\delta$  = 7.17 (m, 6H), 6.68 (m, 3H), 4.27 (s, 2H), 4.03 (s, 1H), 2.34 (s, 3H).  $^{13}\text{C}$  NMR (101 MHz,  $\text{CDCl}_3$ ):  $\delta$  = 148.24, 139.38, 138.34, 129.29, 128.57, 128.34, 128.04, 124.64, 117.59, 112.90, 48.42, 21.46.

#### Synthesis of $N$ -(4-methylbenzyl)aniline<sup>2</sup>

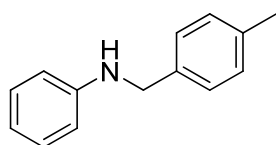

Aniline (93 mg, 1 mmol), 4-methylbenzyl alcohol (183 mg, 1.5 mmol),

50 mg cat-9, 0.5 mmol KOH and 2 ml toluene were added into a 15 mL reaction tube and reacted at 150 °C under Argon atmosphere for 4 h. The crude mixture was purified by column chromatograph (ethyl acetate / petroleum ether = 1/100, v/v; Silica Gel: 200-300 mesh; R<sub>f</sub> = 0.15). Following the procedure above, N-(4-methylbenzyl)aniline (light yellow solid, m.p. 62-64 °C) was obtained (155 mg, Isolated yield = 84%). <sup>1</sup>H NMR (400 MHz, CDCl<sub>3</sub>): δ = 7.19 (m, 6H), 6.68 (m, 3H), 4.27 (s, 2H), 3.97 (s, 1H), 2.34 (s, 3H). <sup>13</sup>C NMR (101 MHz, CDCl<sub>3</sub>): δ = 148.24, 136.90, 136.38, 129.33, 129.27, 127.55, 117.52, 112.87, 48.12, 21.12.

#### Synthesis of N-(2-methoxybenzyl)aniline<sup>7</sup>

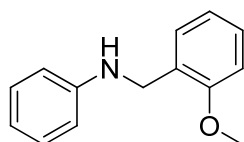

Aniline (93 mg, 1 mmol), 2-methoxybenzyl alcohol (207 mg, 1.5 mmol), 50 mg cat-9, 0.5 mmol KOH and 2 ml toluene were added into a 15 mL reaction tube and reacted at 150 °C under Argon atmosphere for 8 h. The crude mixture was purified by column chromatograph (ethyl acetate / petroleum ether = 1/150, v/v; Silica Gel: 200-300 mesh; R<sub>f</sub> = 0.08). Following the procedure above, N-(2-methoxybenzyl)aniline (white solid, m.p. 93-94 °C) was obtained (177 mg, Isolated yield = 83%). <sup>1</sup>H NMR (400 MHz, CDCl<sub>3</sub>): δ = 7.21 (m, 4H), 6.90 (dd, 2H), 6.67 (dd, 3H), 4.33 (s, 2H), 4.12 (s, 1H), 3.85 (s, 3H). <sup>13</sup>C NMR (101 MHz, CDCl<sub>3</sub>): δ = 157.43, 148.45, 129.19, 128.93, 128.32, 127.38, 120.55, 117.36, 113.09, 110.28, 55.33, 43.49.

#### Synthesis of N-(3-phenoxybenzyl)aniline<sup>8</sup>

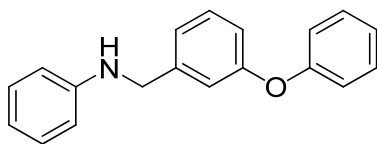

Aniline (93 mg, 1 mmol), (3-phenoxyphenyl)methanol (300 mg, 1.5 mmol), 50 mg cat-9, 0.5 mmol KOH and 2 ml toluene were added into a 15 mL reaction tube and reacted at 150 °C under Argon atmosphere for 8 h. The crude mixture was purified by column chromatograph (ethyl acetate / petroleum ether = 1/150, v/v; Silica Gel: 200-300 mesh; R<sub>f</sub> = 0.08). Following the procedure above, N-(3-chlorobenzyl) aniline (light yellow solid, m.p. 58-60 °C) was obtained (266 mg, Isolated yield = 97%). <sup>1</sup>H NMR (400 MHz, CDCl<sub>3</sub>): δ = 7.31 (m, 3H), 7.14 (m, 4H), 7.01 (dd, 3H), 6.90 (d, 1H), 6.72 (t, 1H), 6.61 (d, 2H), 4.30 (s, 2H), 4.05 (s, 1H). <sup>13</sup>C NMR (101 MHz, CDCl<sub>3</sub>): δ = 157.62, 157.08, 147.96, 141.68, 129.94, 129.78, 129.28, 123.33, 122.17, 118.96, 117.80, 117.70, 117.51, 112.93, 48.08.

#### Synthesis of N-(3-chlorobenzyl)aniline<sup>2</sup>

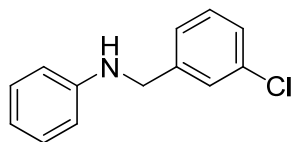

Aniline (93 mg, 1 mmol), (3-chlorophenyl)methanol (213 mg, 1.5 mmol), 50 mg cat-9, 0.5 mmol KOH and 2 ml toluene were added into a 15 mL reaction tube and reacted at 150 °C under Argon atmosphere for 8 h. The crude mixture was purified by column chromatograph (ethyl acetate / petroleum ether = 1/100, v/v; Silica Gel: 200-300 mesh; R<sub>f</sub> = 0.08). Following the procedure above, N-(3-chlorobenzyl) aniline (light yellow liquid) was obtained (206 mg, Isolated yield = 95%). <sup>1</sup>H NMR (400 MHz, CDCl<sub>3</sub>): δ = 7.23 (m, 6H), 6.67 (m, 3H), 4.30 (s, 2H), 4.06 (s, 1H). <sup>13</sup>C NMR (101 MHz, CDCl<sub>3</sub>): δ = 147.81, 141.77, 134.56, 129.92, 129.34, 127.45, 127.40, 125.44, 117.90, 112.93, 47.81.

### Synthesis of N-(3-fluorobenzyl)aniline<sup>9</sup>

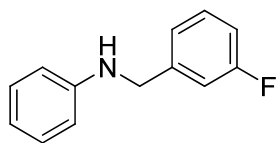

Aniline (93 mg, 1 mmol), (3-fluorophenyl)methanol (189 mg, 1.5 mmol), 50 mg cat-9, 0.5 mmol KOH and 2 ml toluene were added into a 15 mL reaction tube and reacted at 150 °C under Argon atmosphere for 8 h. The crude mixture was purified by column chromatograph (ethyl acetate / petroleum ether = 1/150, v/v; Silica Gel: 200-300 mesh; R<sub>f</sub> = 0.13). Following the procedure above, N-(3-fluorobenzyl) aniline (light yellow liquid) was obtained (129 mg, Isolated yield = 64%). <sup>1</sup>H NMR (400 MHz, CDCl<sub>3</sub>): δ = 7.20 (m, 5H), 6.94 (td, J = 8.4, 2.2 Hz, 1H), 6.72 (t, J = 7.3 Hz, 1H), 6.60 (d, J = 7.7 Hz, 2H), 4.32 (s, 2H), 4.08 (s, 1H). <sup>13</sup>C NMR (101 MHz, CDCl<sub>3</sub>): δ = 164.41, 161.96, 147.84, 142.41, 142.34, 130.18, 130.10, 129.34, 122.82, 122.80, 117.87, 114.30, 114.18, 114.09, 113.97, 112.93, 47.82.

### Synthesis of N-(pyridin-2-ylmethyl)aniline<sup>2</sup>

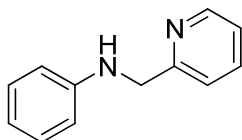

Aniline (93 mg, 1 mmol), pyridin-2-ylmethanol (164 mg, 1.5 mmol), 50 mg cat-9, 0.5 mmol KOH and 2 ml toluene were added into a 15 mL reaction tube and reacted at 150 °C under Argon atmosphere for 8 h. The crude mixture was purified by column chromatograph (ethyl acetate / petroleum ether = 1/2, v/v; Silica Gel: 200-300 mesh; R<sub>f</sub> = 0.28). Following the procedure above, N-(pyridin-2-ylmethyl)aniline (yellow solid, m.p. 50-51 °C) was obtained (180 mg, Isolated yield = 98%). <sup>1</sup>H NMR (400 MHz, CDCl<sub>3</sub>): δ = 8.59 (d, 1H), 7.64 (t, 1H), 7.35 (t, 1H), 7.18 (t, 3H), 6.72 (t, 1H), 6.67 (d, 2H), 4.63 (s, 1H), 4.47 (s, 2H). <sup>13</sup>C NMR (101 MHz, CDCl<sub>3</sub>): δ = 158.55, 149.21, 147.91, 136.68, 129.27, 122.12, 121.63, 117.63, 113.08, 49.31.

### Synthesis of N-(pyridin-3-ylmethyl)aniline<sup>2</sup>

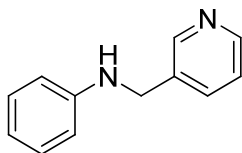

Aniline (93 mg, 1 mmol), pyridin-3-ylmethanol (164 mg, 1.5 mmol), 50 mg cat-9, 0.5 mmol KOH and 2 ml toluene were added into a 15 mL reaction tube and reacted at 150 °C under Argon atmosphere for 8 h. The crude mixture was purified by column chromatograph (ethyl acetate / petroleum ether = 1/2, v/v; Silica Gel: 200-300 mesh; R<sub>f</sub> = 0.15). Following the procedure above, N-(pyridin-3-ylmethyl)aniline (light yellow solid, m.p. 93-95 °C) was obtained (140 mg, Isolated yield = 76%). <sup>1</sup>H NMR (400 MHz, CDCl<sub>3</sub>): δ = 8.56 (m, 2H), 7.70 (d, 1H), 7.22 (m, 3H), 6.70 (m, 3H), 4.36 (s, 2H), 4.05 (s, 1H). <sup>13</sup>C NMR (101 MHz, CDCl<sub>3</sub>): δ = 149.19, 148.74, 147.64, 135.13, 134.94, 129.37, 123.57, 118.08, 112.98, 45.84.

### Synthesis of N-(4-methylthiobenzyl)aniline<sup>10</sup>

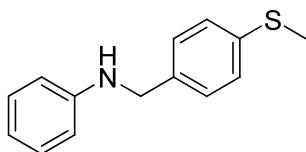

Aniline (93 mg, 1 mmol), 4-methylthiobenzyl alcohol (231 mg, 1.5



mmol), 50 mg cat-9, 0.5 mmol KOH and 2 ml toluene were added into a 15 mL reaction tube and reacted at 150 °C under Argon atmosphere for 8 h. The crude mixture was purified by column chromatograph (ethyl acetate / petroleum ether = 1/150, v/v; Silica Gel: 200-300 mesh; Rf = 0.07). Following the procedure above, N-(4-methylthiobenzyl)aniline (light brown solid, m.p. 34-36 °C) was obtained (218 mg, Isolated yield = 95%). <sup>1</sup>H NMR (400 MHz, CDCl<sub>3</sub>): δ = 7.21 (m, 6H), 6.68 (m, 3H), 4.28 (s, 2H), 4.05 (s, 1H), 2.47 (s, 3H). <sup>13</sup>C NMR (101 MHz, CDCl<sub>3</sub>): δ = 148.03, 137.21, 136.42, 129.30, 128.06, 127.04, 117.70, 112.93, 47.91, 16.07.

### Supplementary References

- (1). Cui, X.; Zhang, Y.; Shi, F.; Deng, Y. *Chem. Eur. J.* **2011**, *17*, 1021-1028.
- (2). He, W.; Wang, L.; Sun, C.; Wu, K.; He, S.; Chen, J.; Wu, P.; Yu, Z. *Chem. Eur. J.* **2011**, *17*, 13308-13317.
- (3). Ling, X; Xiong, Y; Huang, R; Zhang, X; Zhang, S; Chen, C.J. *Org. Chem.* **2013**, *78*, 5218–5226.
- (4). *US Patent* 2003/207939 A1, 2003.
- (5). Anderson, K; Mendez-Perez, M; Priego, J; Buchwald, S.J. *Org. Chem.* **2003**, *68*, 9563-9573.
- (6). Warner, P; Bardos, T. *J. Med. Chem.* **1970**, *13*, 407-410.
- (7). Zhang, Y; Qi, X; Cui, X; Shi, F; Deng, Y. *Tetrahedron Lett.* **2011**, *52*, 1334 – 1338.
- (8). Popov, Y; Korchagina, T; Chicherina, G, Ermakova, T. *Russ. J. Org. Chem.* **2004**, *40*, 685-689.
- (9). Santoro, F.; Psaro, R.; Ravasio, N.; Zaccheria, F. *RSC Adv.* **2014**, *4*, 2596-2600.
- (10). Sousa, S.; Fernandes, A. *Adv. Synth. Catal.* **2010**, *352*, 2218-2226.



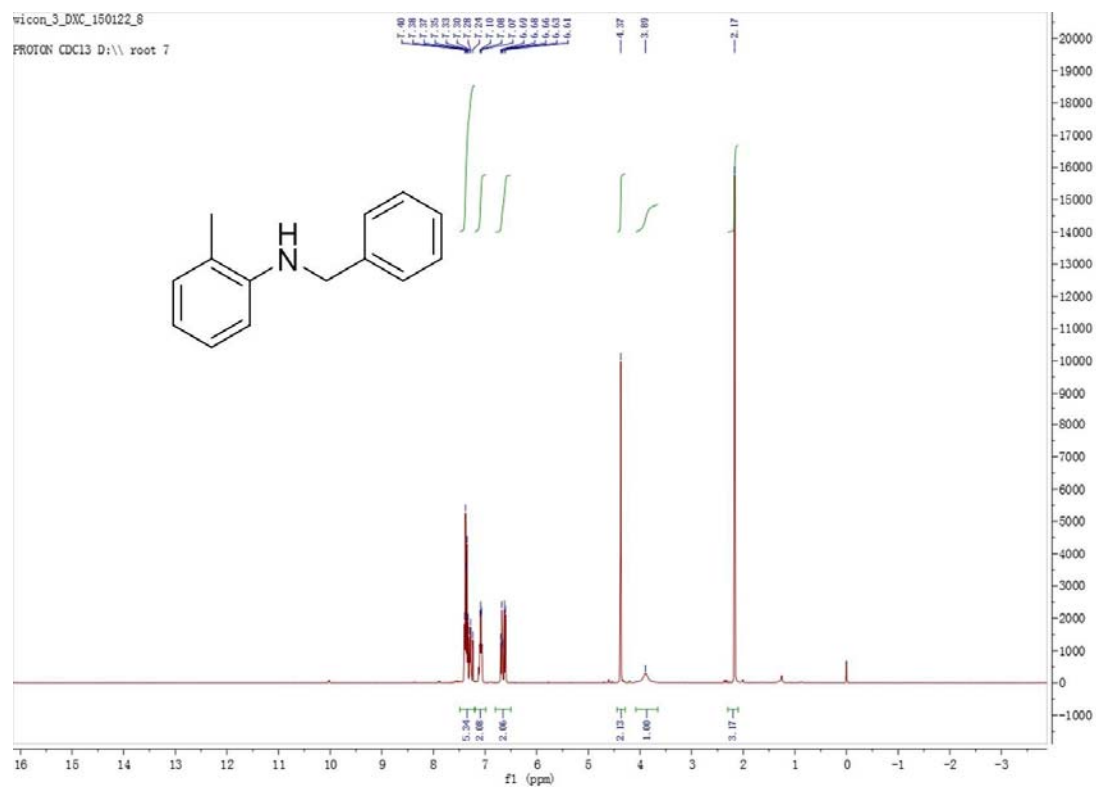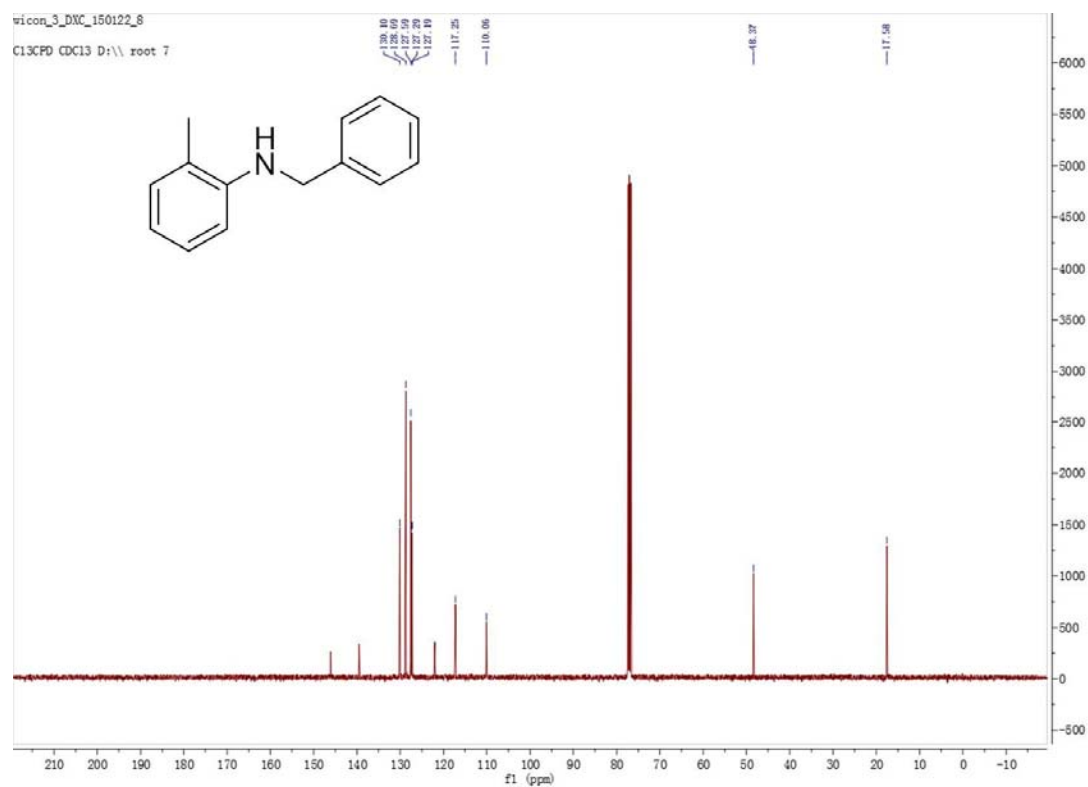

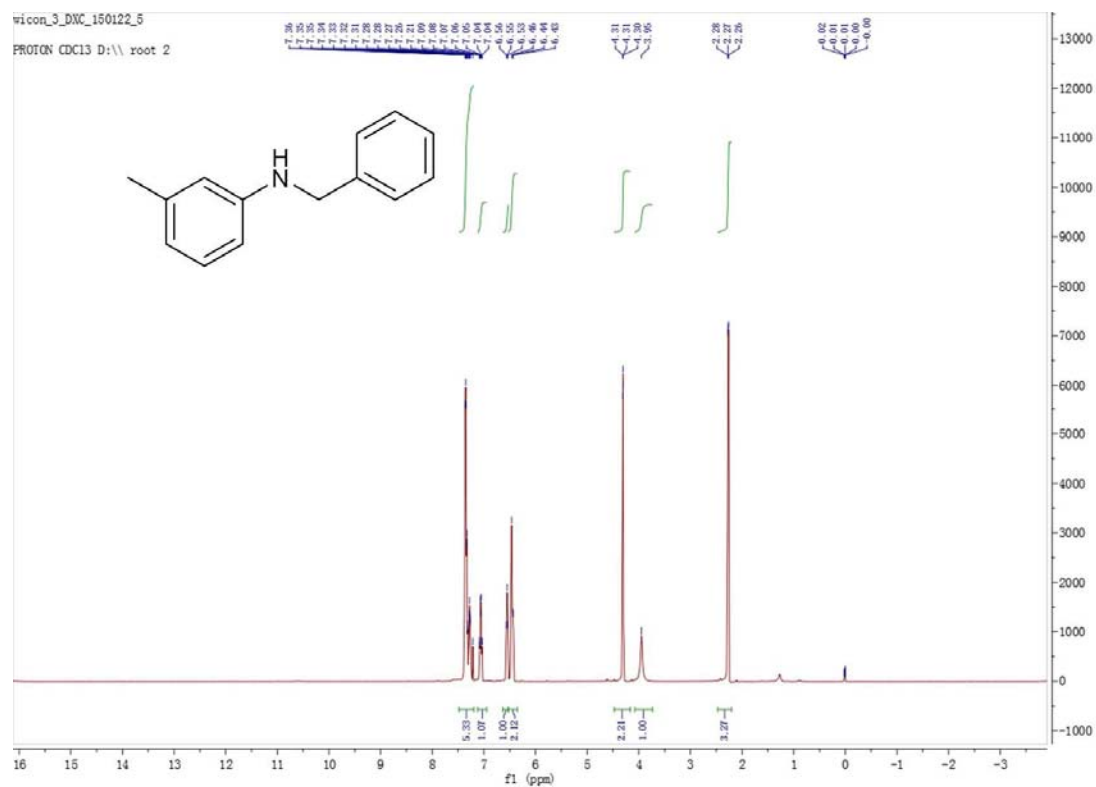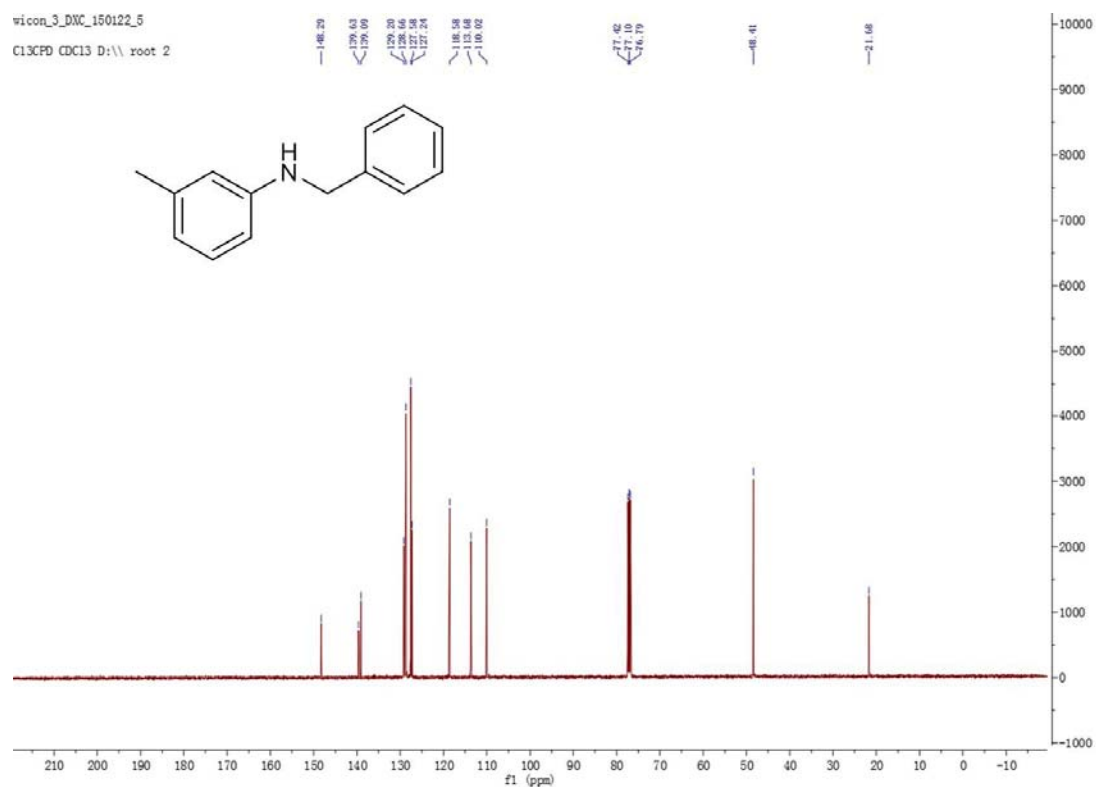

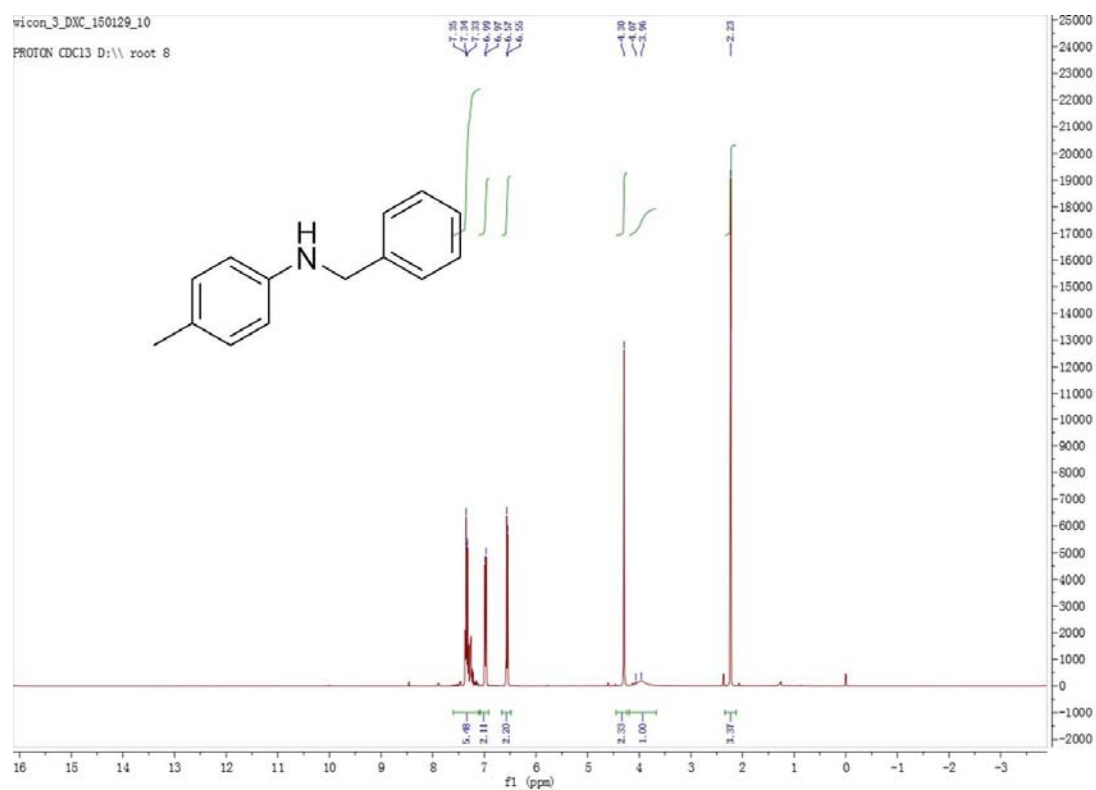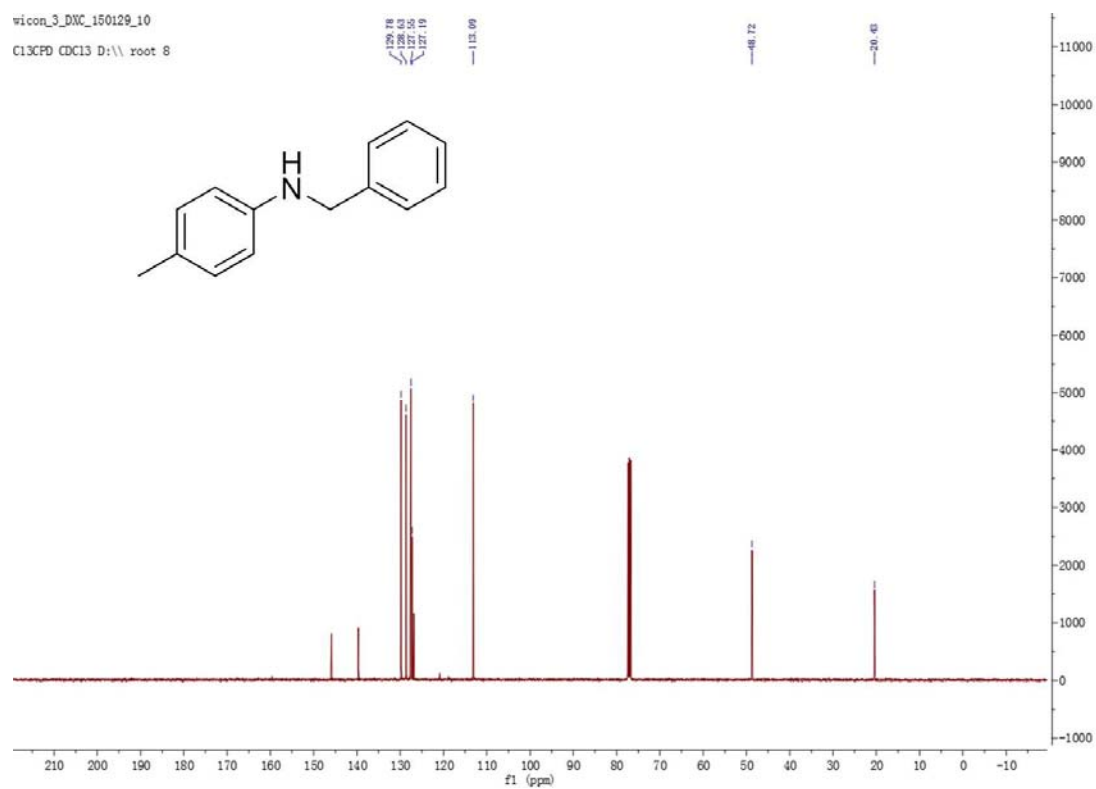

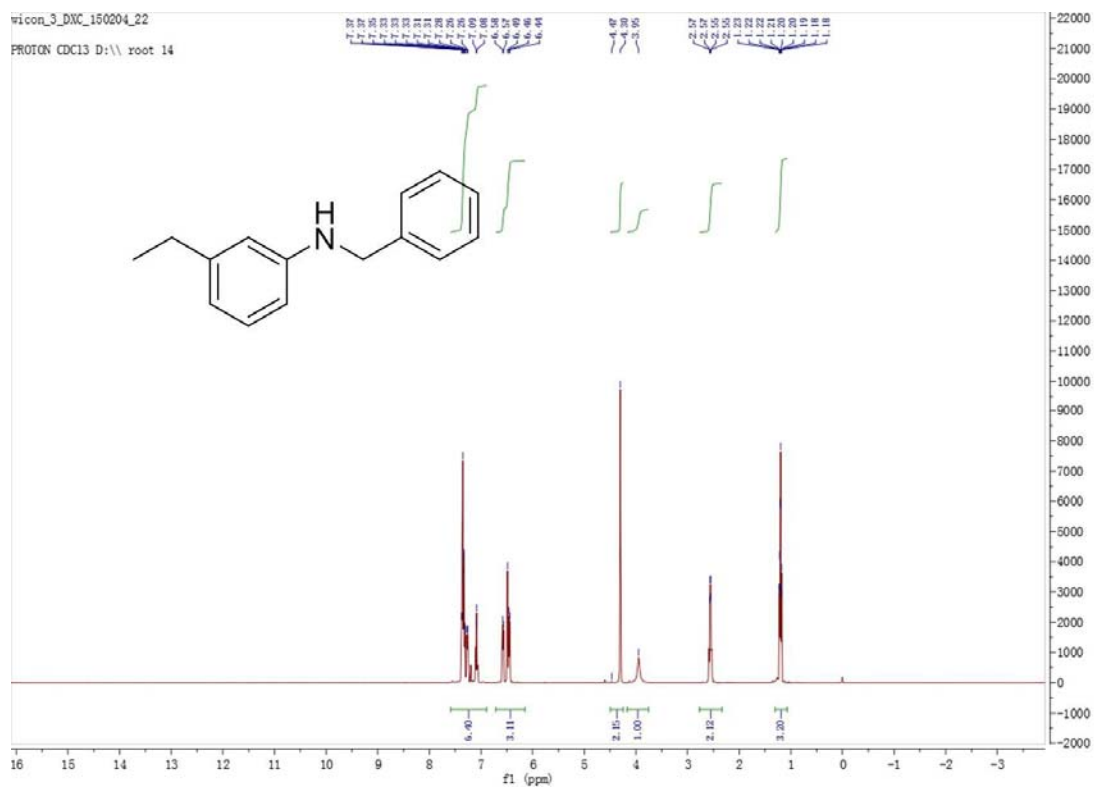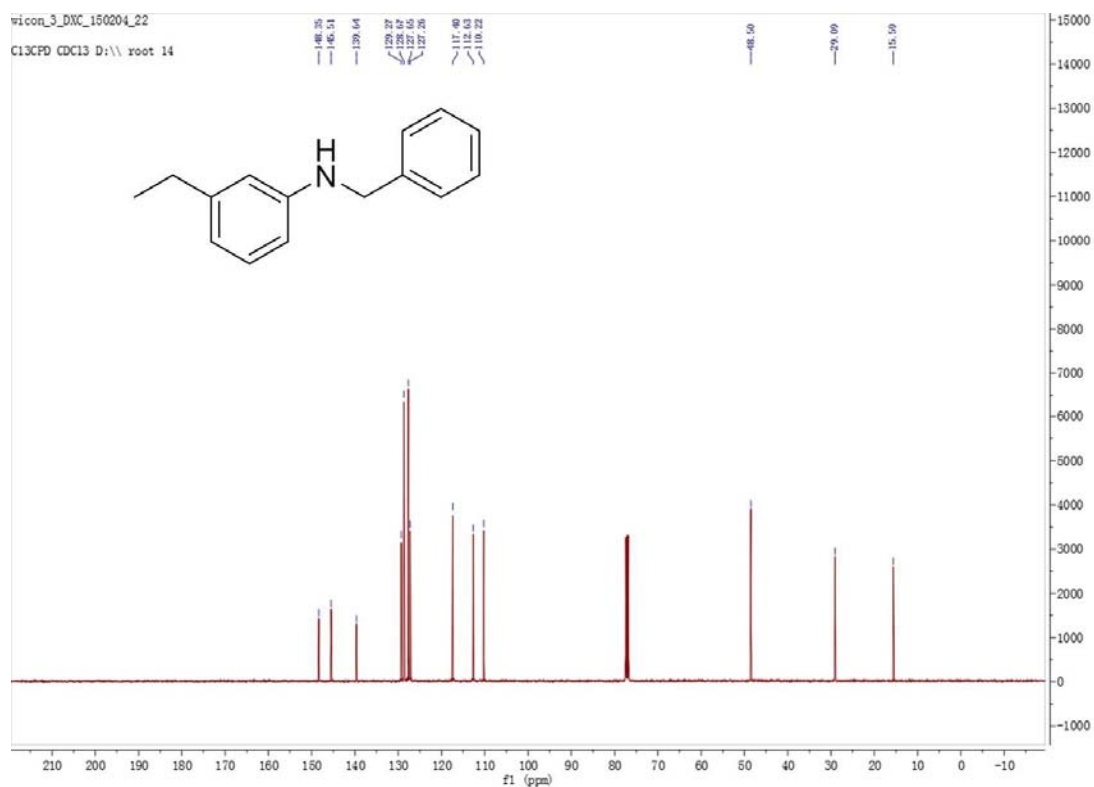

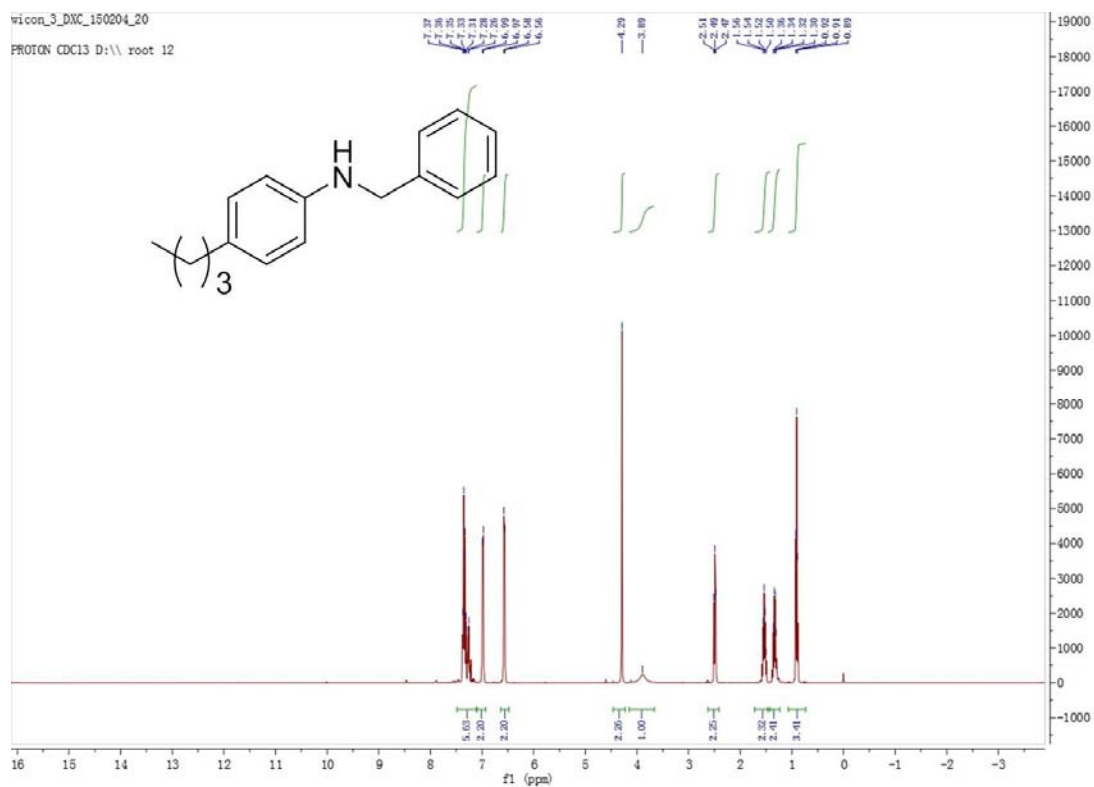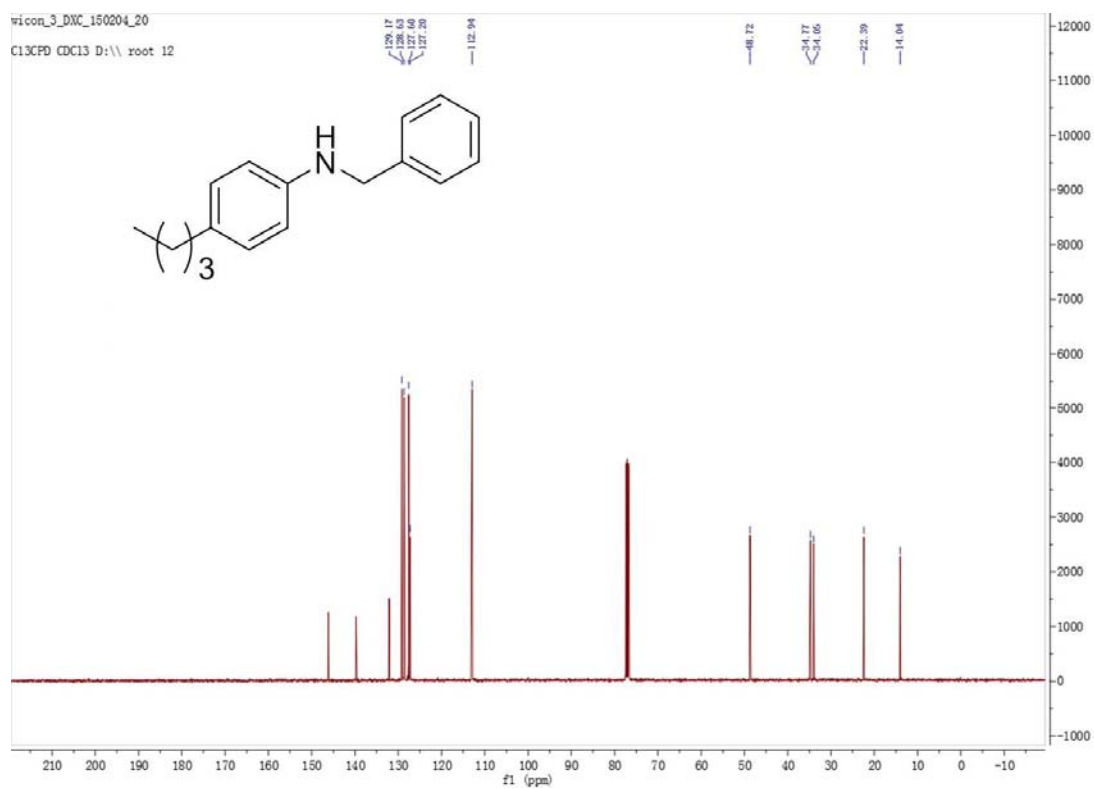







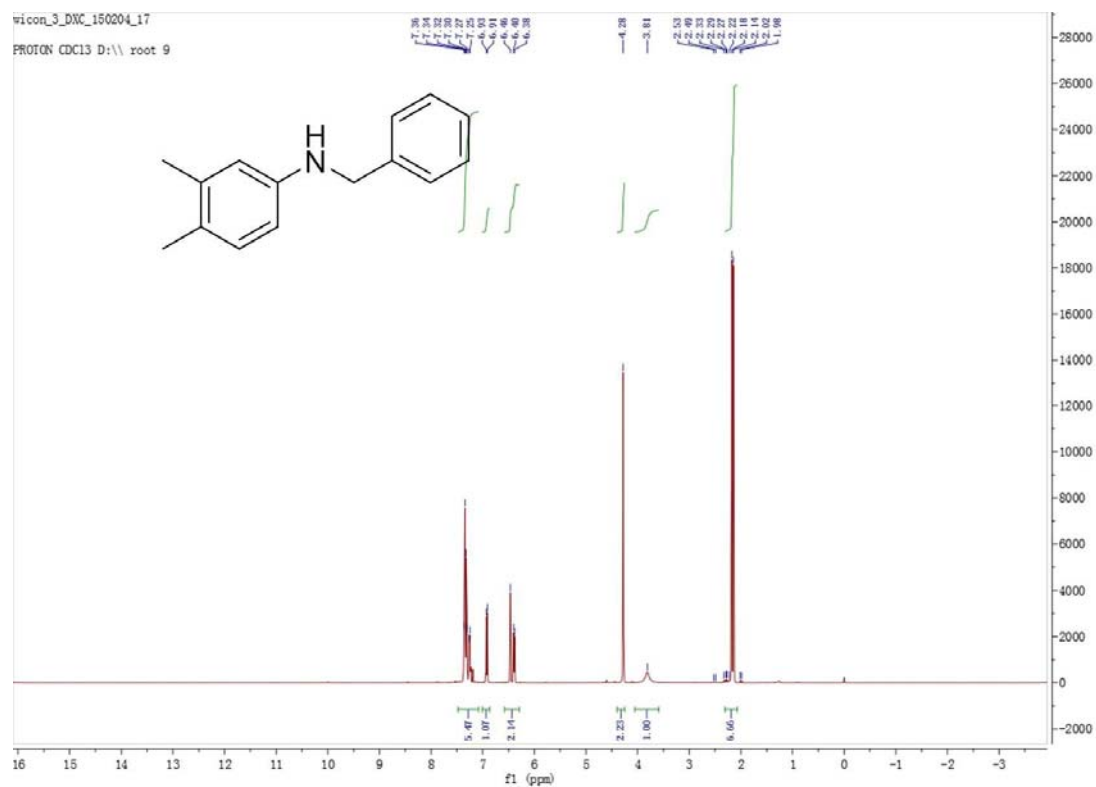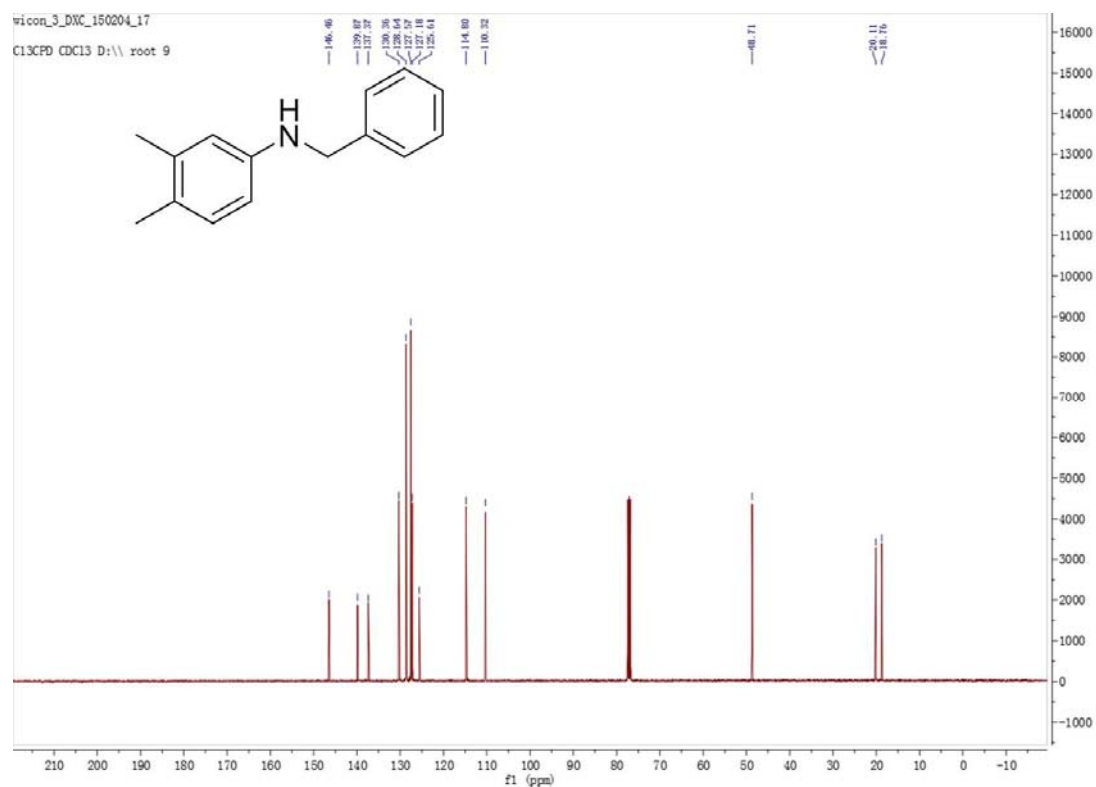

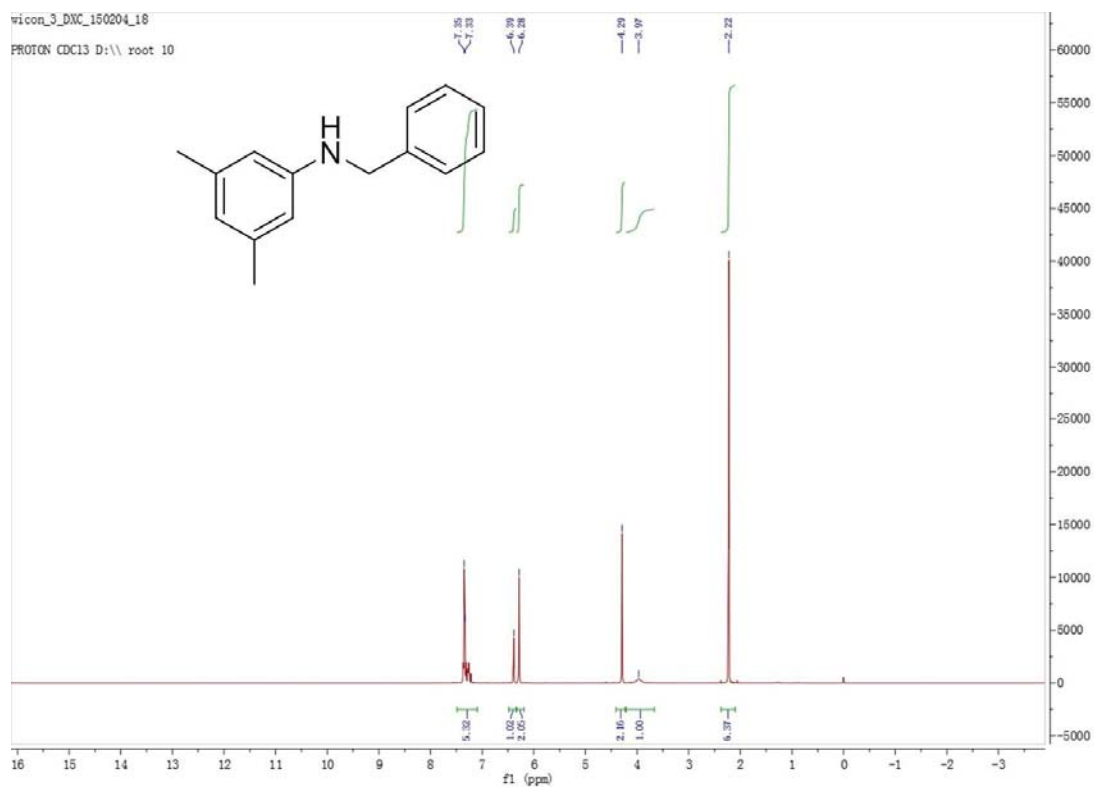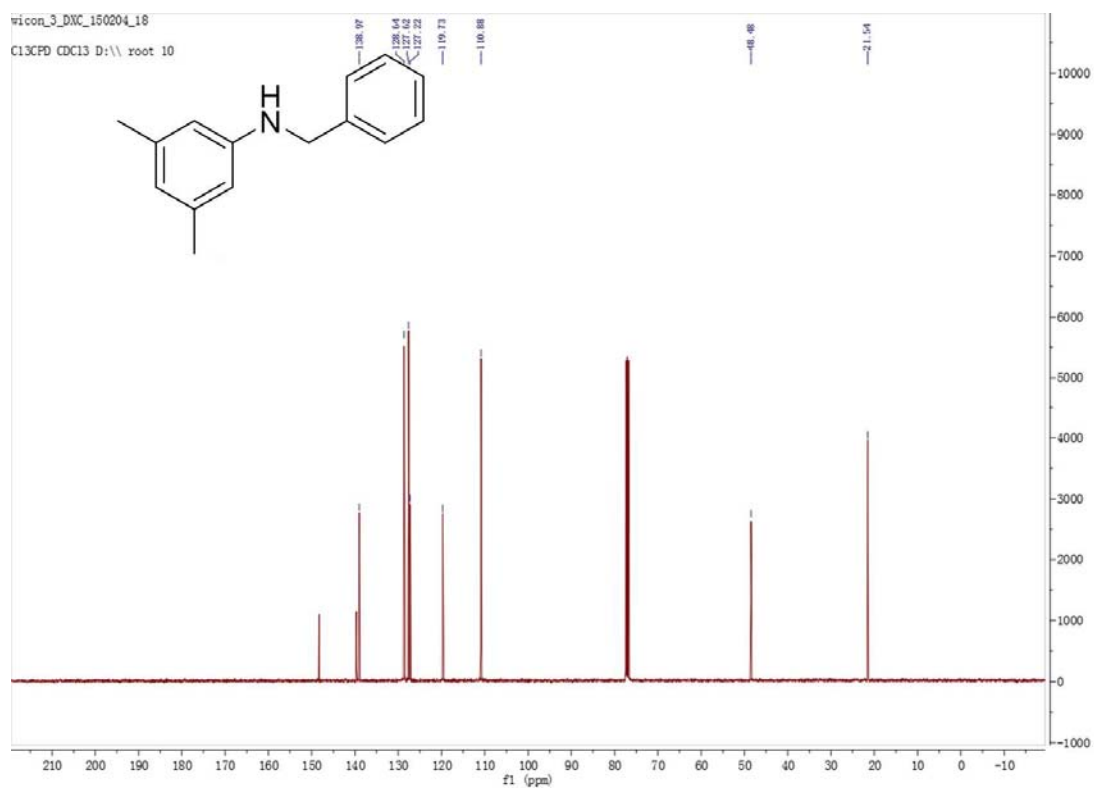

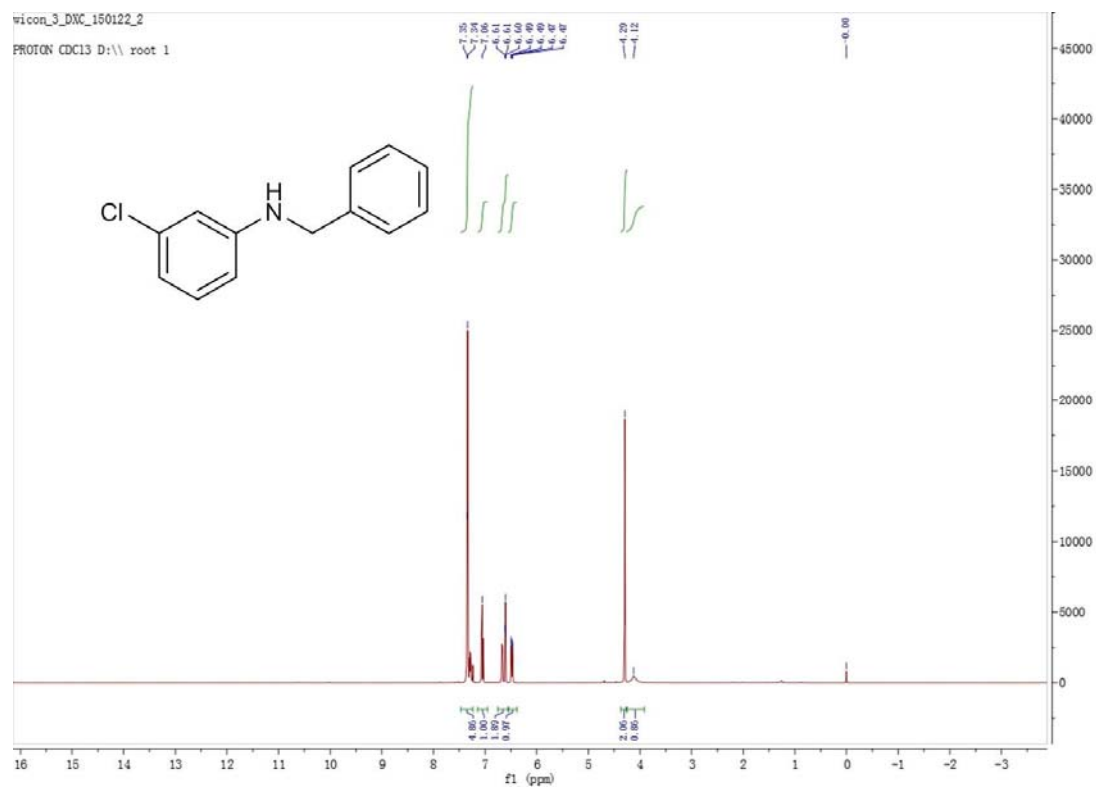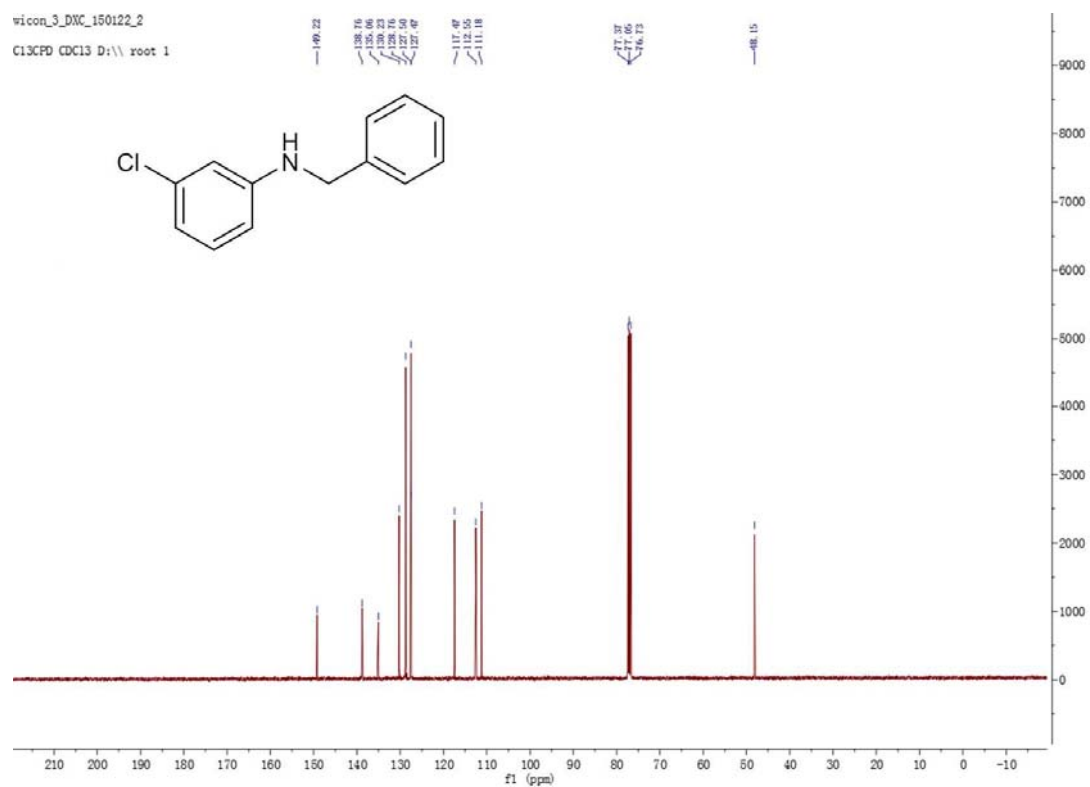





wicon\_3\_DXC\_150129\_9  
 PROTON CDCl3 D:\\ root 7

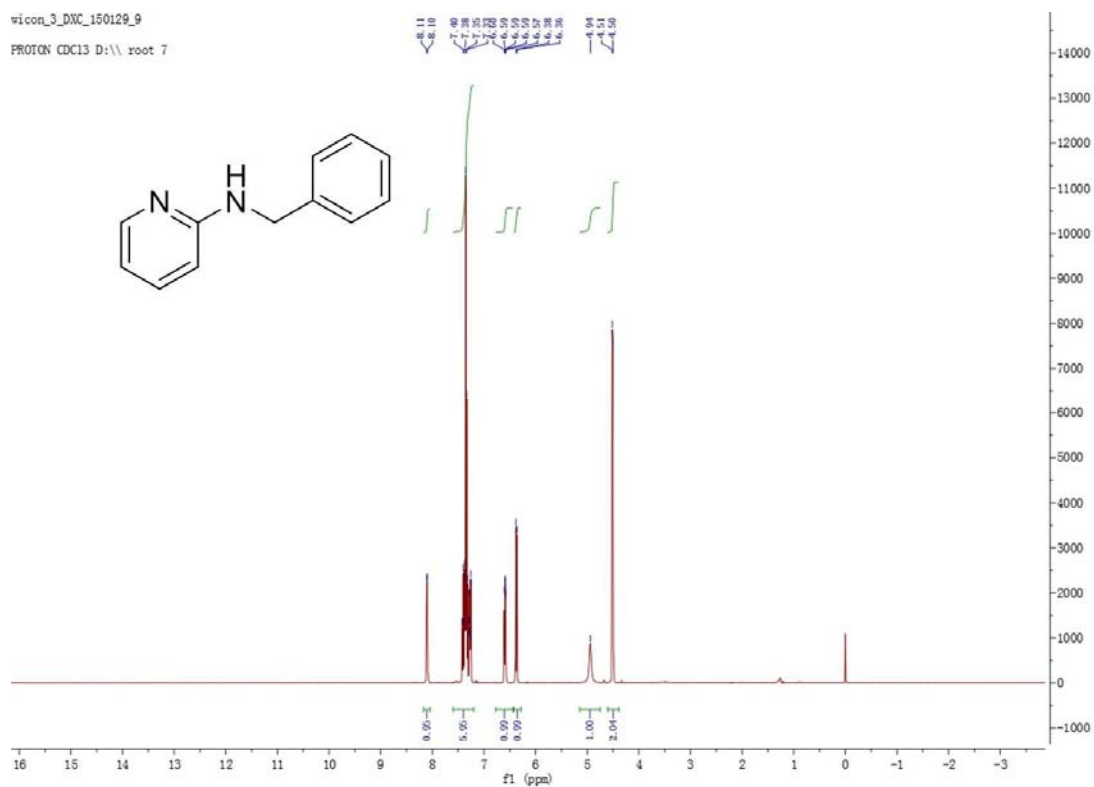





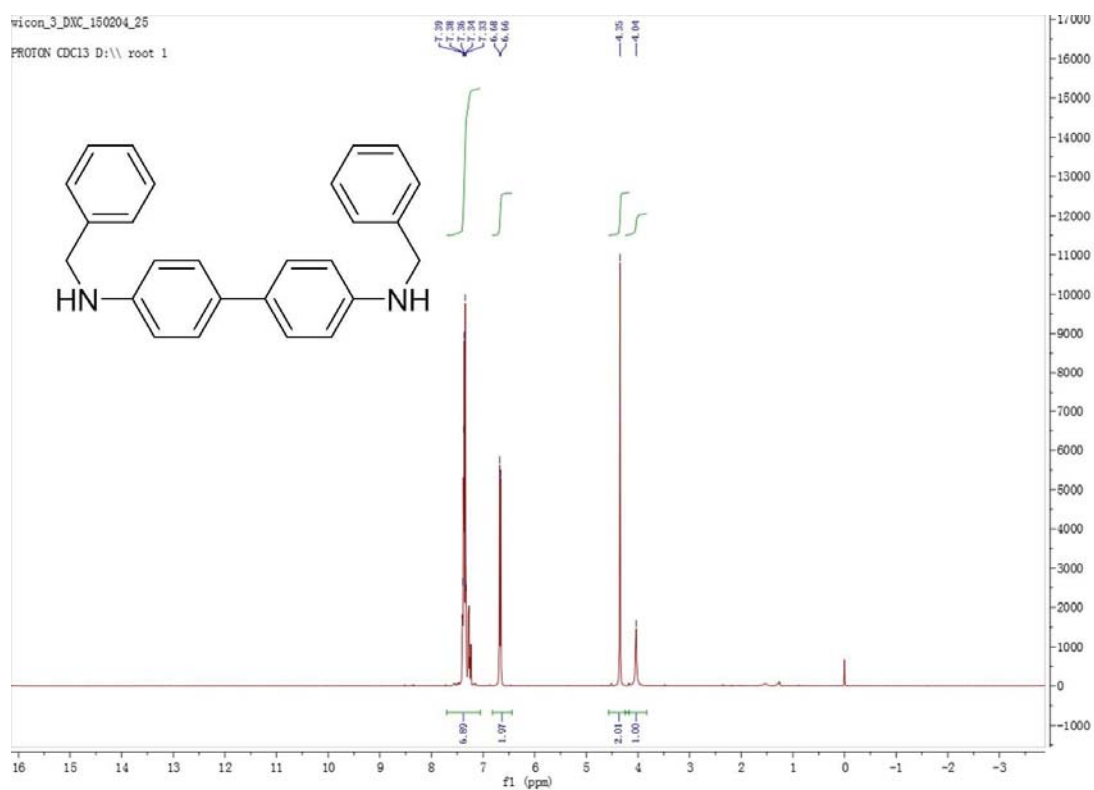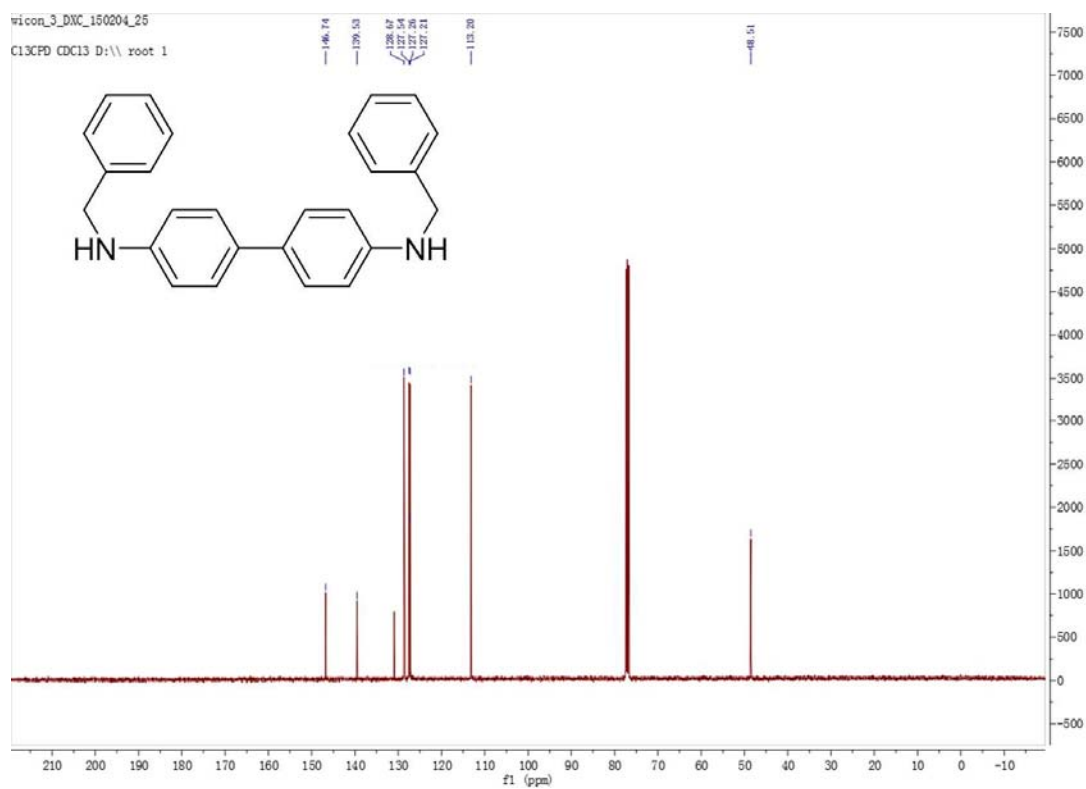

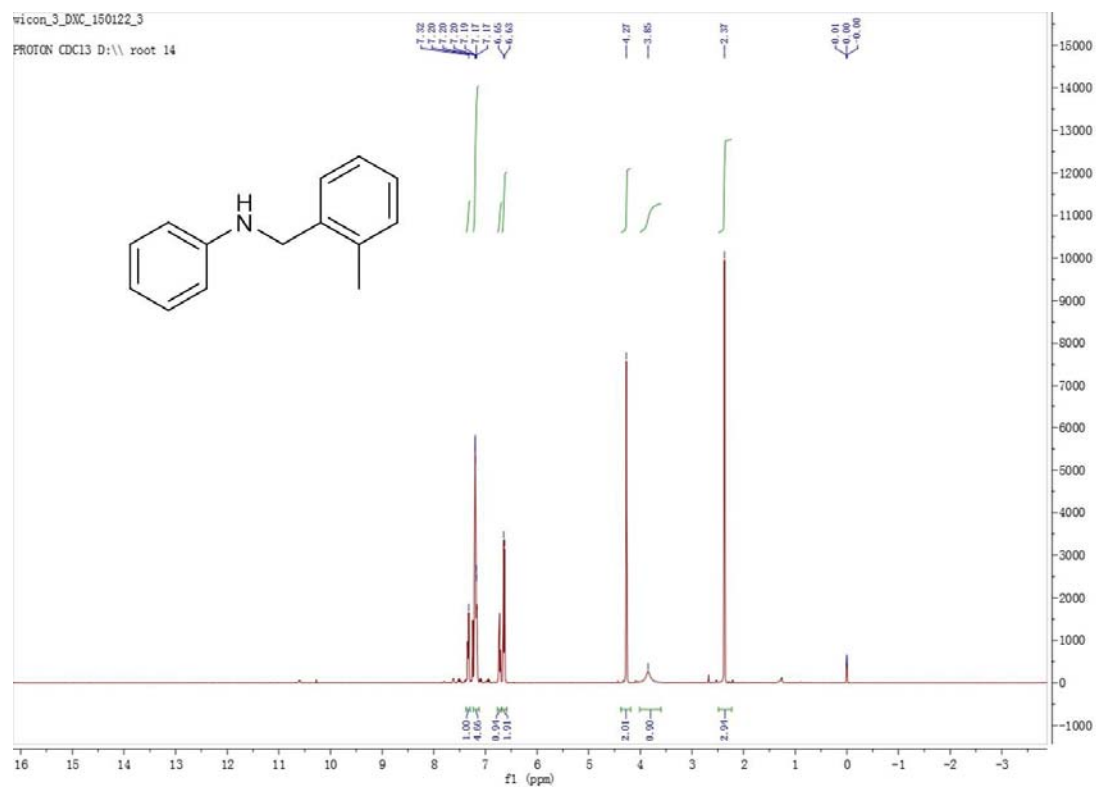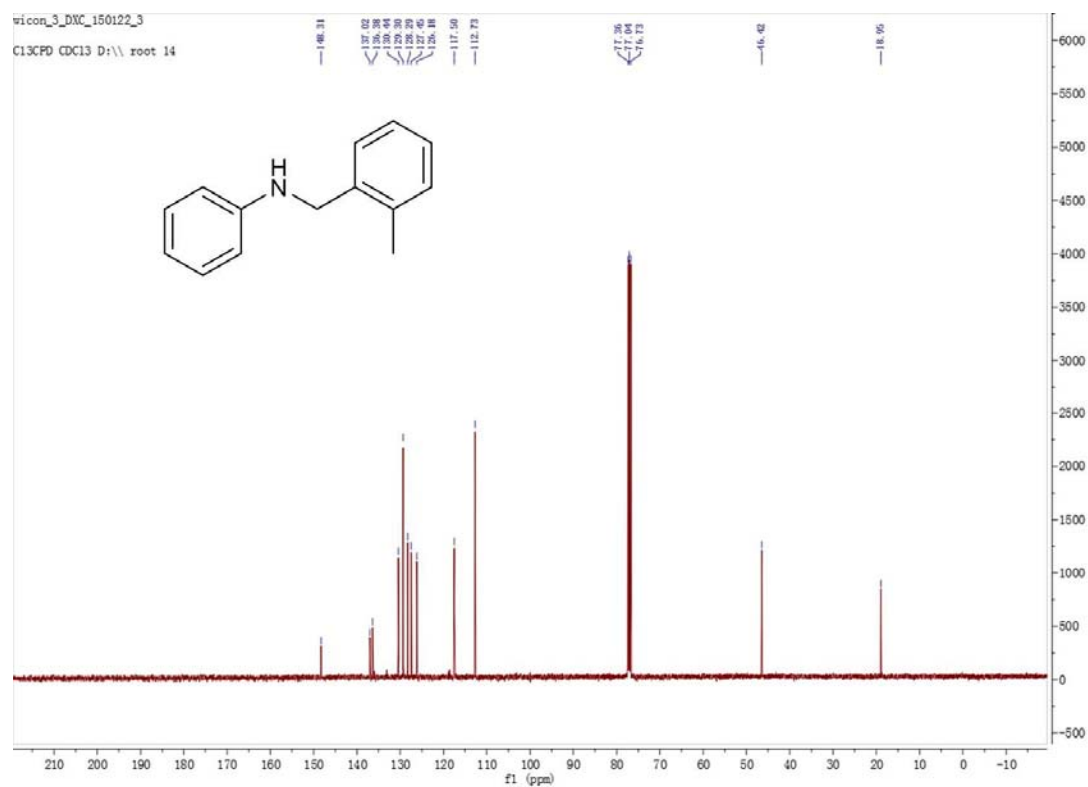

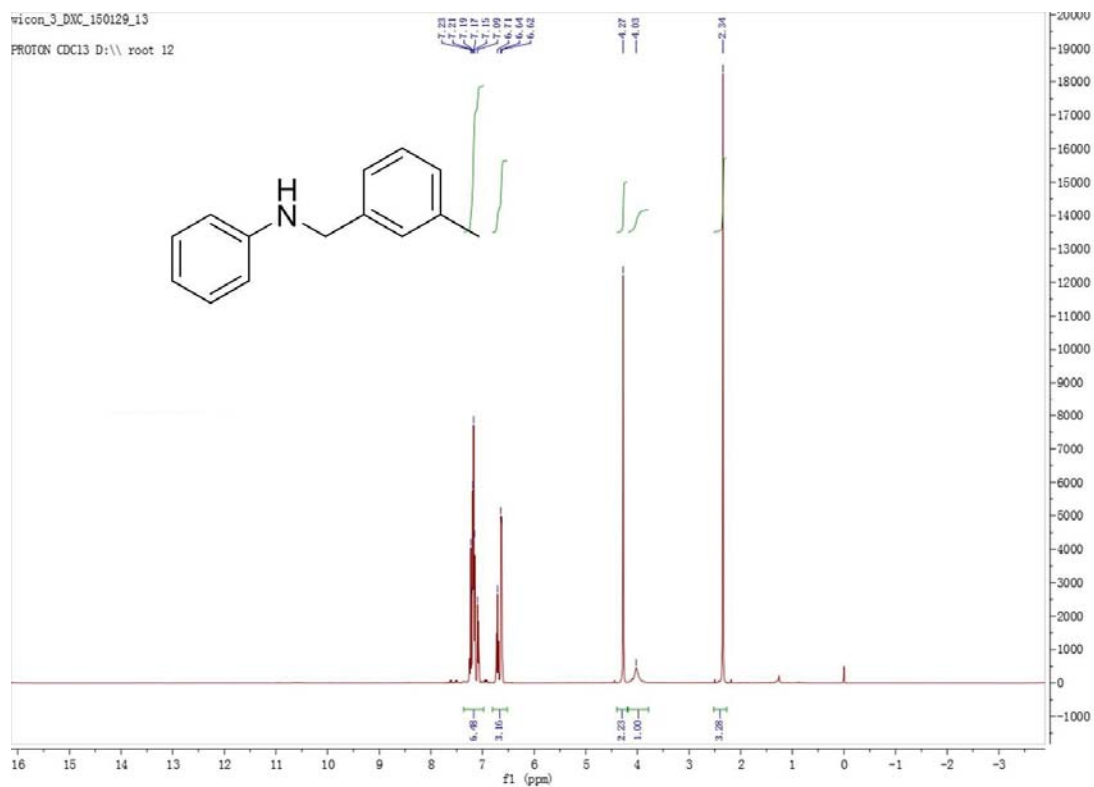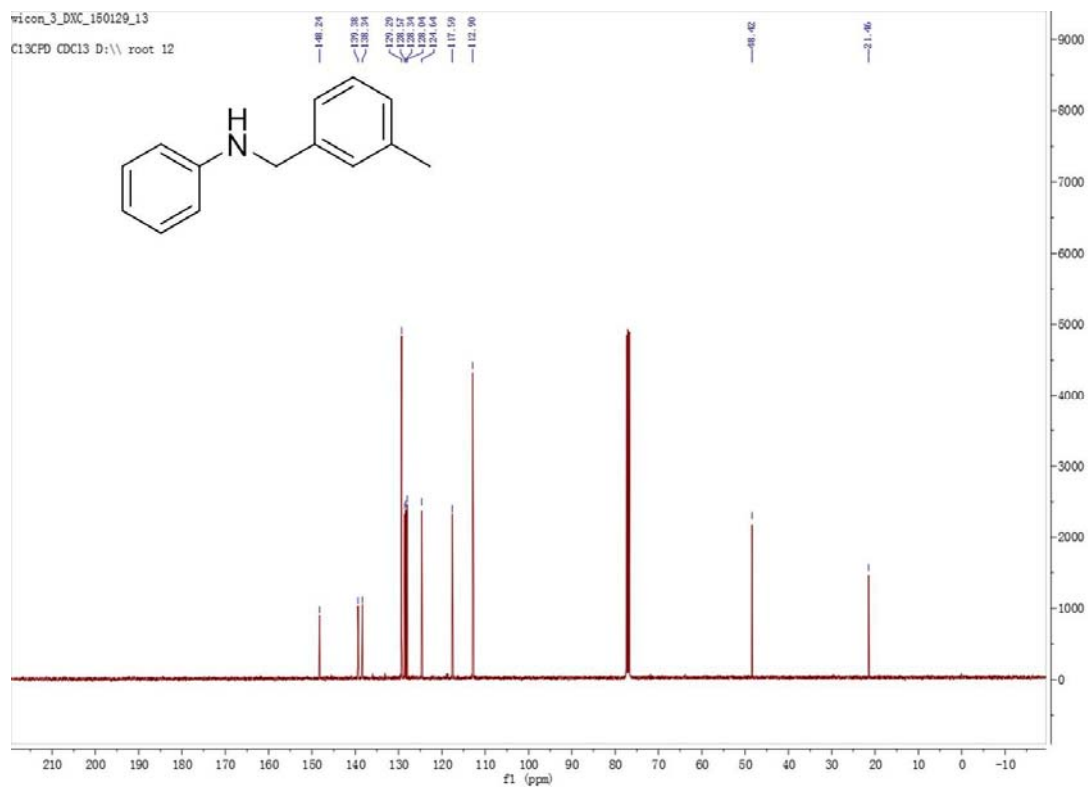

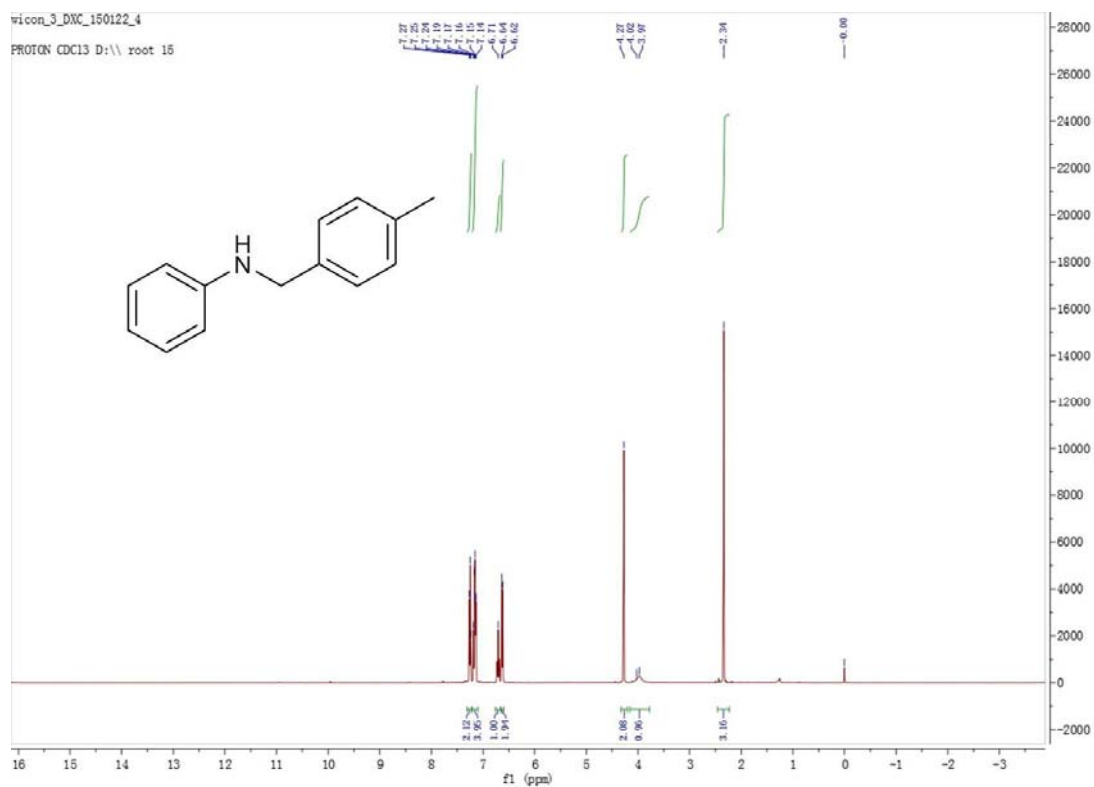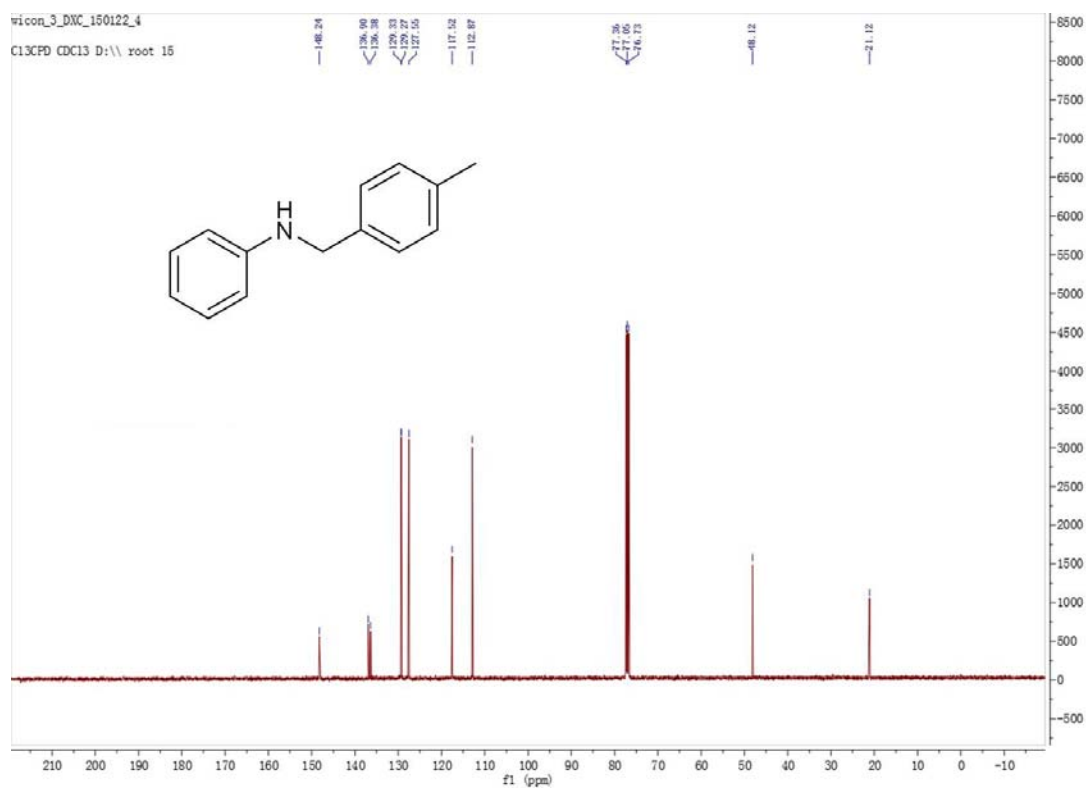

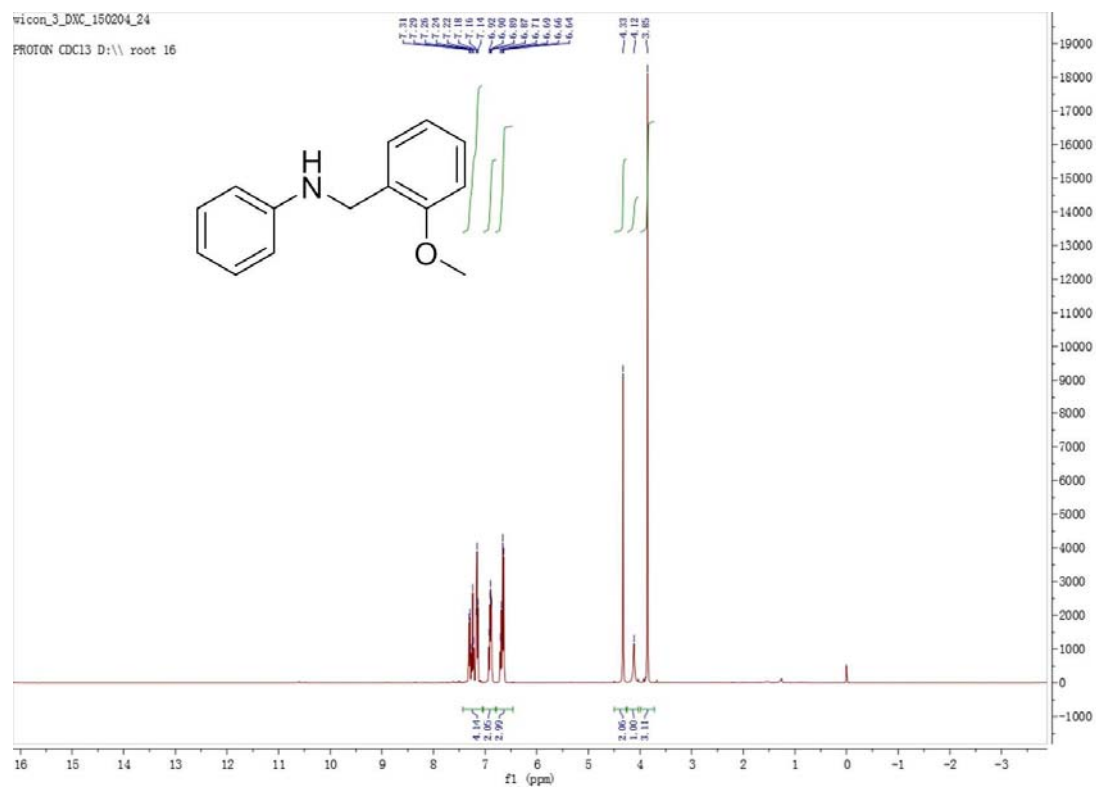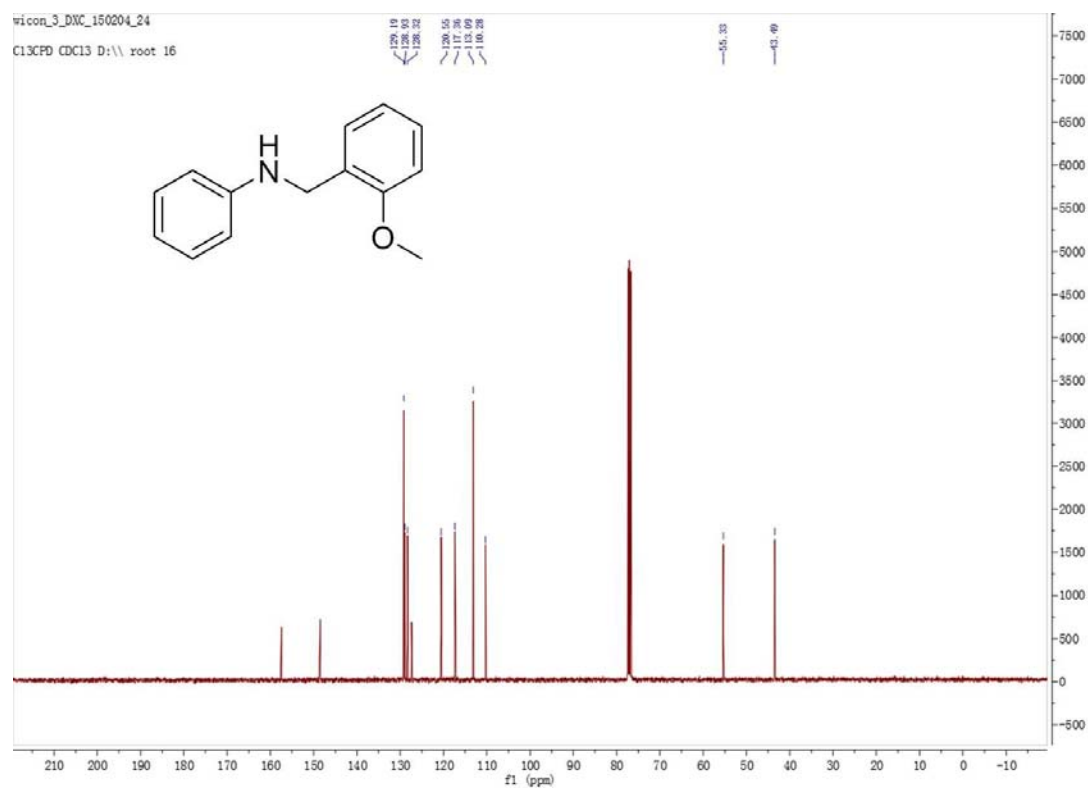



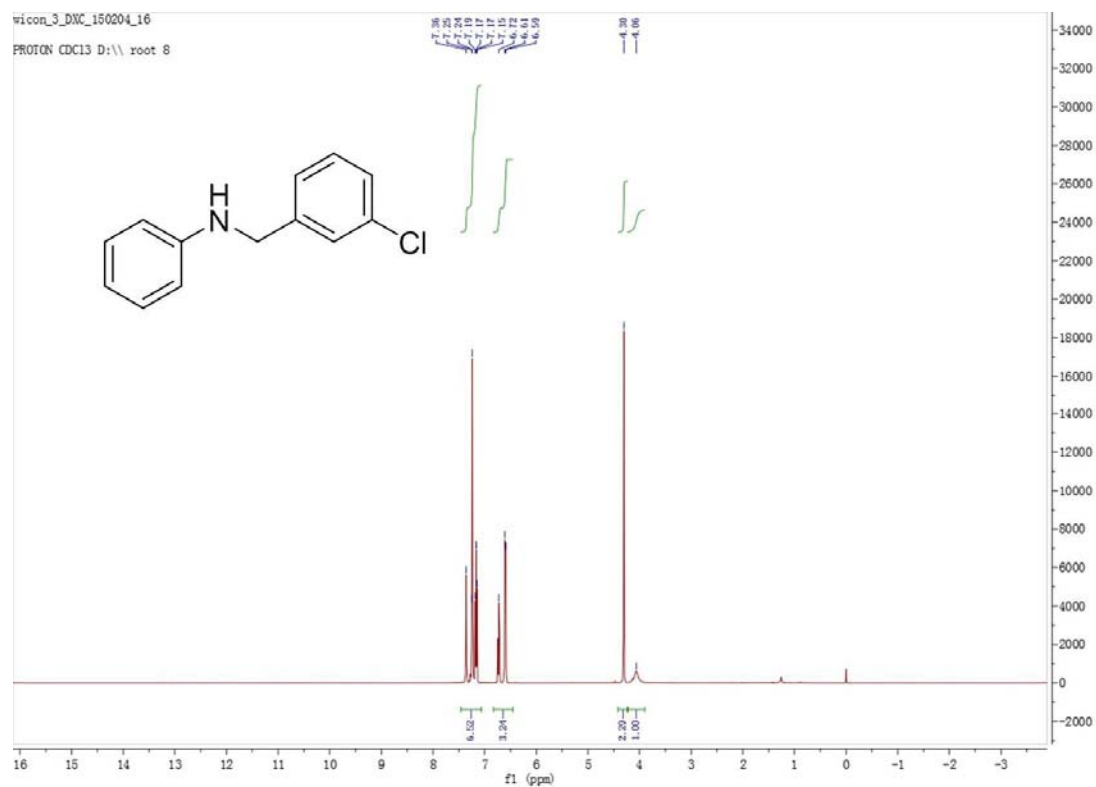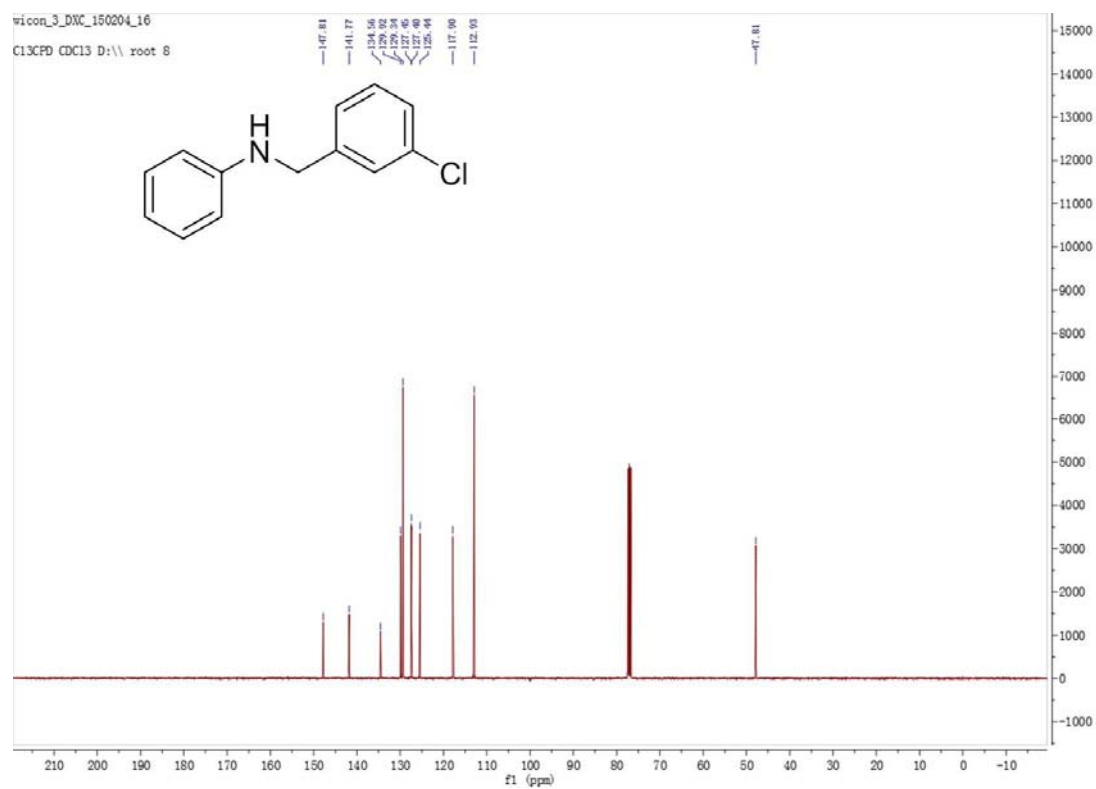









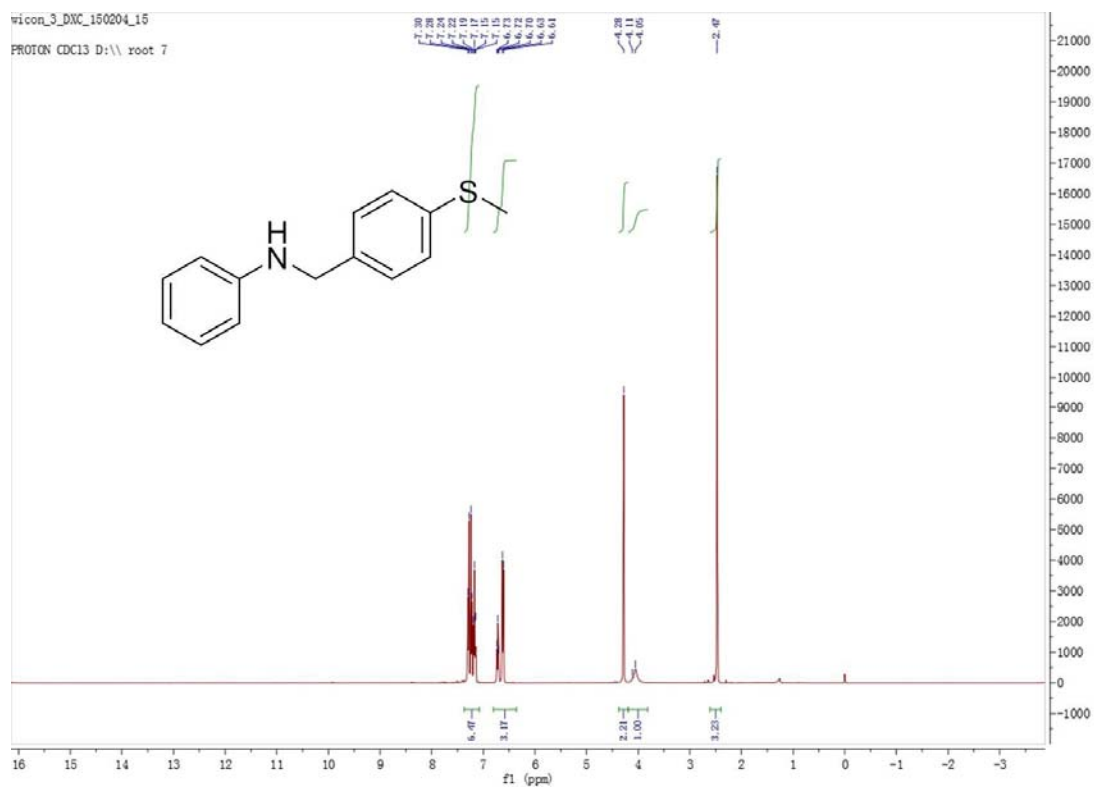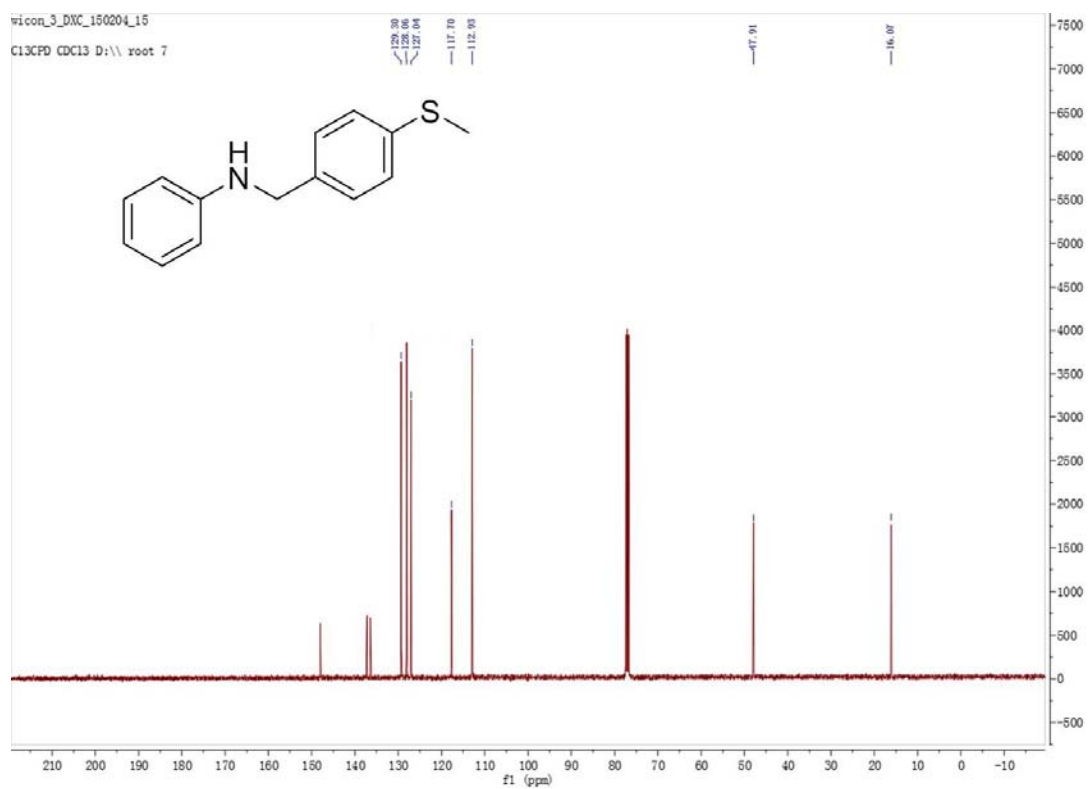

Supplement: c5ra07681a1.pdf [file c5ra07681a1.pdf]
